# Supplementary material for: Proliferative CD8 T-cells : A Novel Immune Microenvironmental Determinant of Outcomes in Multiple Myeloma
Source: Research Square preprint supplement (doi:10.21203/rs.3.rs-6929982/v1), 2025-07-03

## **Supplementary Methods**

### **1. Sample Preparation**

Fresh bone marrow (BM) aspirate samples were cryopreserved in 90% fetal bovine serum and subsequently sorted into CD138+ and CD138- fractions. Samples were stored in liquid nitrogen until ready for use.

### **2. Tissue Microarray Analysis by Multiplexed Immunofluorescence**

First, cell segmentation was carried out on the DAPI stained nuclei using the software's nuclei detection application. A region of interest was selected for each core for the evaluation of each marker which included positive cells, negative cells and the background area. This was done to train the software to differentiate between marker-specific positive and negative cells. Then, individual deep learning APPs (Application Protocol Packages) were created for all markers and the data was analysed via batch analysis. The data generated included the total number of nuclei, mean intensity for each marker and object information for all cells in each core. The object information labels each cell as positive or negative for a particular marker. When this data was compiled and exported, we were able to identify specific cell populations.

### **3. Hyperplex Immunohistochemistry for Spatial Phenotyping**

The images were analysed using HALO v3.6 (Indica Labs, Albuquerque, NM, USA) software. Binary classification of each protein biomarker was conducted based on visually-guided thresholding of intensity values. Then, proximity analysis was carried out to tabulate the distance (within 500µm)(1) between major immune cell types and CD38+CD138+ plasma cells was carried out. Using RStudio (Ver. 2023.6.1.524), the distribution of the distances between each major immune cell type and CD38+CD138+ plasma cells was visualized and the average distance was tabulated. Using RStudio (Ver. 2023.6.1.524), the SPIAT package (<https://trigosteam.github.io/SPIAT/>) was used for spatial analysis. Clusters were defined based on manual phenotyping of the protein biomarkers, and mean pairwise distance was tabulated between the clusters, taking into account all cells and distances. Lastly, the Wilcoxon rank sum test was used to test for any statistical significance between the mean pairwise distances of immune cell clusters and plasma cell cluster.

### **4. Pre-processing of Single Cell Sequencing Data**

We pre-processed raw single-cell sequencing data using the 10X Cell Ranger software, and generated single-cell gene count matrices. We used the SoupX R package (2) to estimate and remove cell-free mRNA contamination. Thereafter, we processed and analyzed the data in Python, using toolkits including Scanpy and MapBatch. We removed putative doublets and empty cells as cells with total UMI counts greater than or less than 3 standard deviations from the mean counts within each batch, and removed potential dead cells as cells with percentage of mitochondrial RNA greater than 10%. Data was normalized by library size followed by log-scaling (log normalization).

The public dataset subset of the validation cohort was downloaded from the single-cell MM atlas (3) but only the subset published by Maura et al. 2023 (4) was used as the others lacked progression data. The data was downloaded in annotated gene-counts format, and the data was log-normalized. This was combined with our generated subset, including only the genes both subsets had in common (26284 genes). Single-cell protein expression data was normalized using CLR normalization, and for each protein, a histogram of expression counts was plotted to determine a cut-off threshold for expression.

## **References**

1. Feng Y, Yang T, Zhu J, Li M, Doyle M, Ozcoban V, et al. Spatial analysis with SPIAT and spaSim to characterize and simulate tissue microenvironments. *Nature Communications*. 2023;14(1):2697.
2. Young MD, Behjati S. SoupX removes ambient RNA contamination from droplet-based single-cell RNA sequencing data. *GigaScience*. 2020;9(12).
3. Foster KA, Rees E, Ainley L, Boyle EM, Lee L, Ward G, et al. Tumour-intrinsic features shape T-cell differentiation through myeloma disease evolution. *medRxiv*. 2024:2024.06.22.24309250.
4. Maura F, Boyle EM, Coffey D, Maclachlan K, Gagler D, Diamond B, et al. Genomic and immune signatures predict clinical outcome in newly diagnosed multiple myeloma treated with immunotherapy regimens. *Nat Cancer*. 2023;4(12):1660-74.

**Supplementary Figure 1 (accompanies Figure 1).** **(a)** Breakdown of cell types in each sample. **(b)** Comparative prevalence of PC clusters among poorer-PFS versus better-PFS patients. Ratio>1 indicates the cluster is more prevalent in PFS≤24 samples; ratio<1 indicates the cluster is more prevalent in PFS>24 samples. **(c)** Logrank test P values for associations between PC clusters and *NSD2*<sup>+</sup>/*FGFR3*<sup>+</sup>/*PCNA*<sup>+</sup> cluster combinations, and PFS. **(d)** KM survival analysis of the PC proliferative index (proportion of *PCNA*<sup>+</sup> cells among PCs) in *PCNA* High and Low groups.

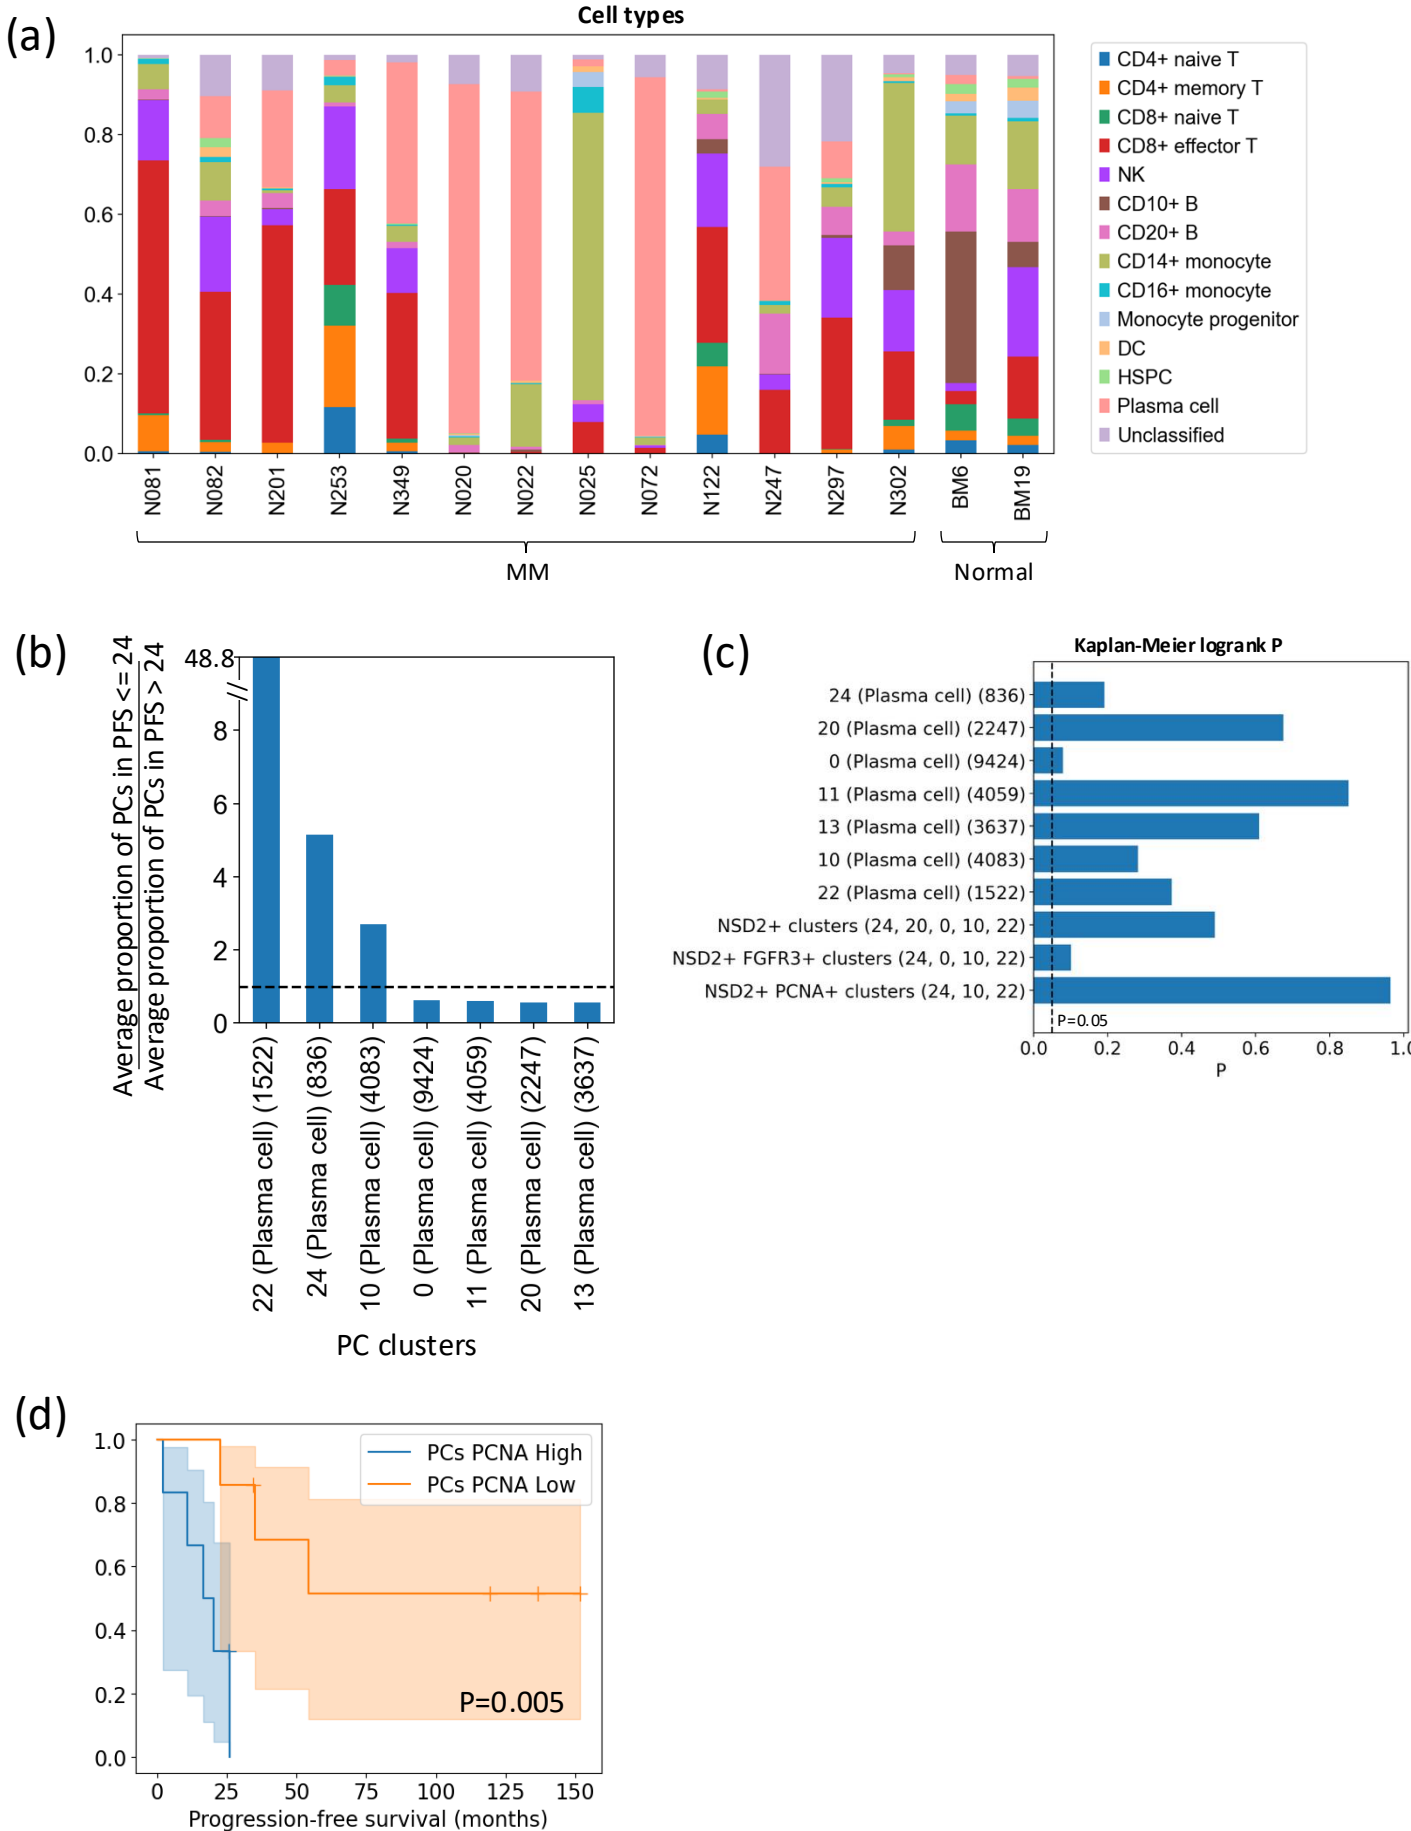

**Supplementary Figure 2 (accompanies Figure 2). (a)** Downregulated genes in Cluster 27 cells compared to other T cells. **(b)** Cell cycle phase prediction of TME clusters, demonstrating the proportion of cells in each phase of the cell cycle by cluster. **(c)** Cell identification prediction of cell clusters using DISCO CellID.

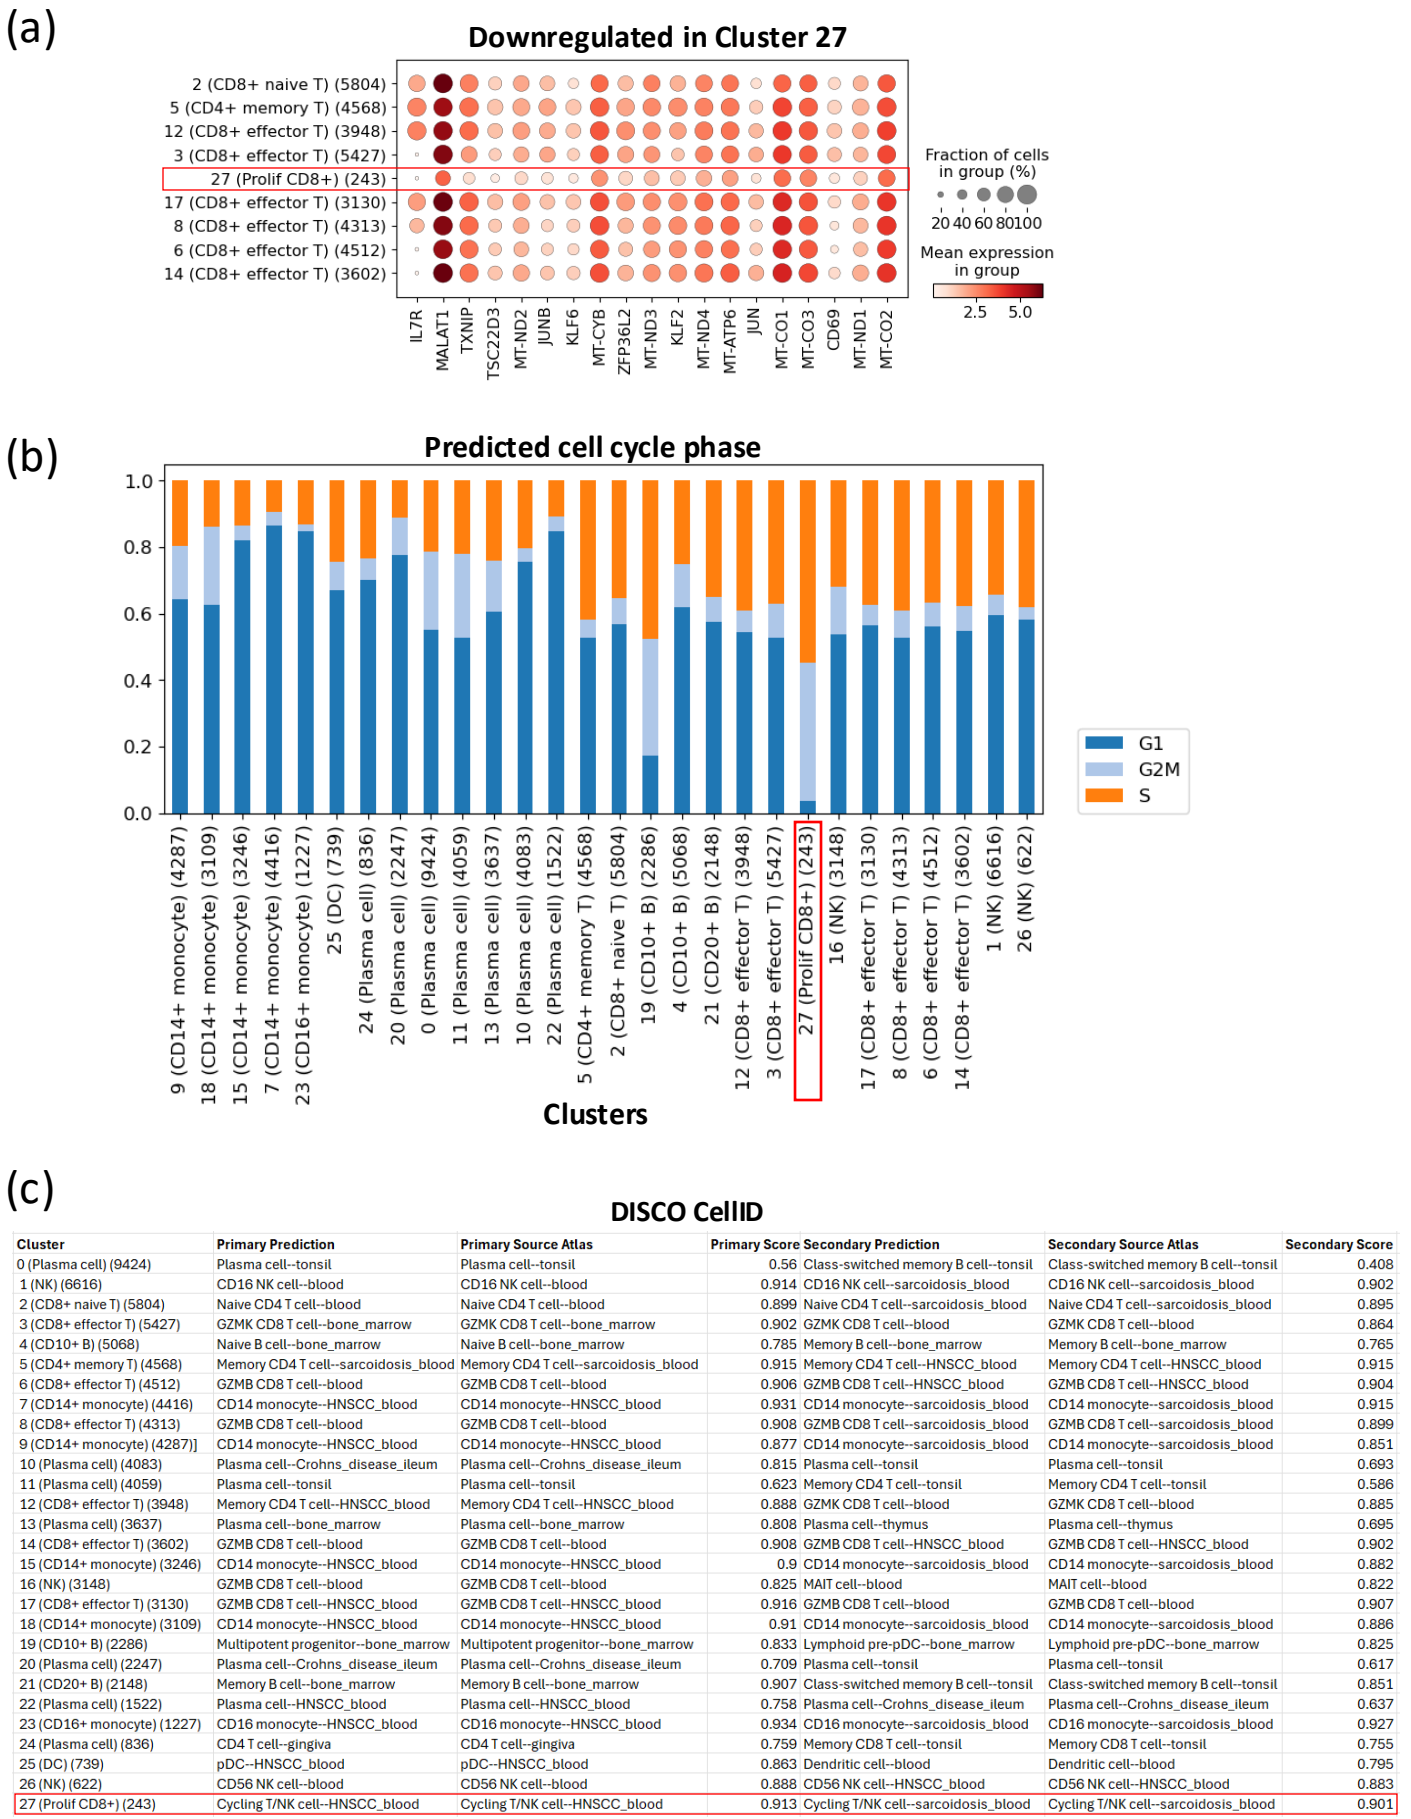

**Supplementary Figure 2 (continued). (d)** Logrank test P values for association between TME cell clusters and PFS. **(e)** Negative control KM survival analyses of *CD8A-MKI67*<sup>+</sup> and *CD8A-PCNA*<sup>+</sup> High and Low groups. **(f)** Evaluating the correlation between Cluster 27 proportion in the TME and *PCNA*<sup>+</sup> proportion in PCs.

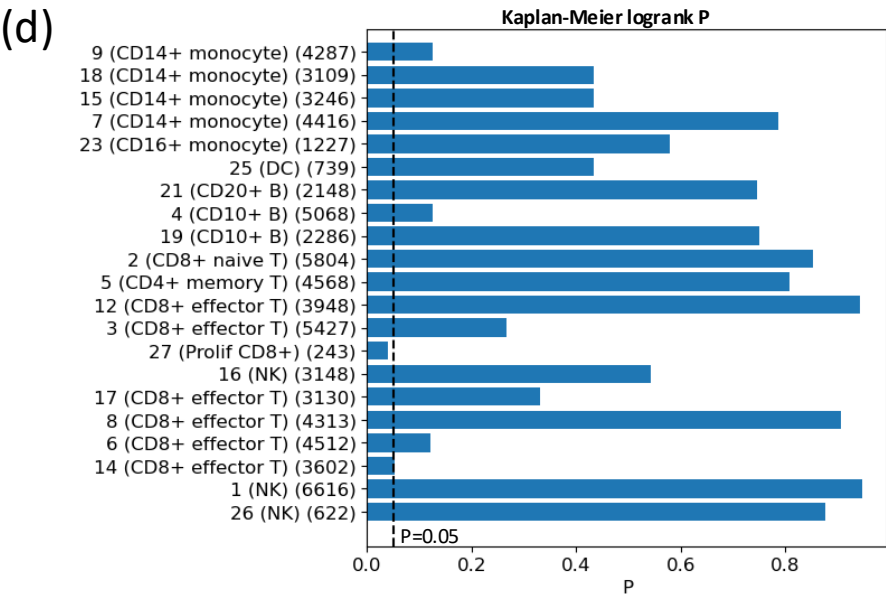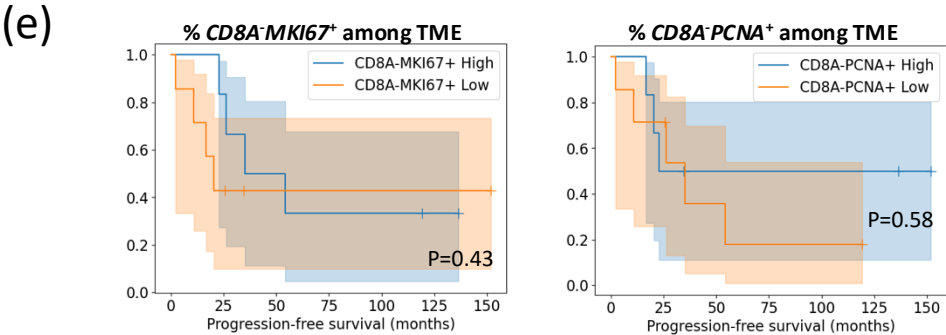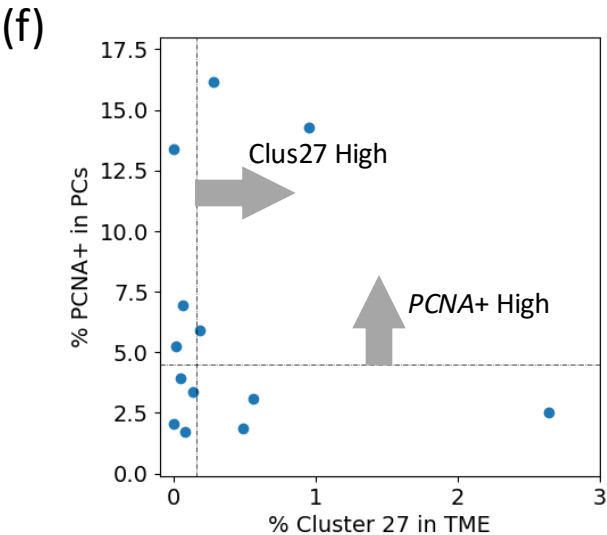

**Supplementary Figure 2 (continued). (g)** Single-variable CoxPH survival analysis. **(h)** Double-variable CoxPH survival analyses (Clus27 status with each other covariate). Covariates with P<0.1 in single or double-variable analysis were selected for multivariable analysis.

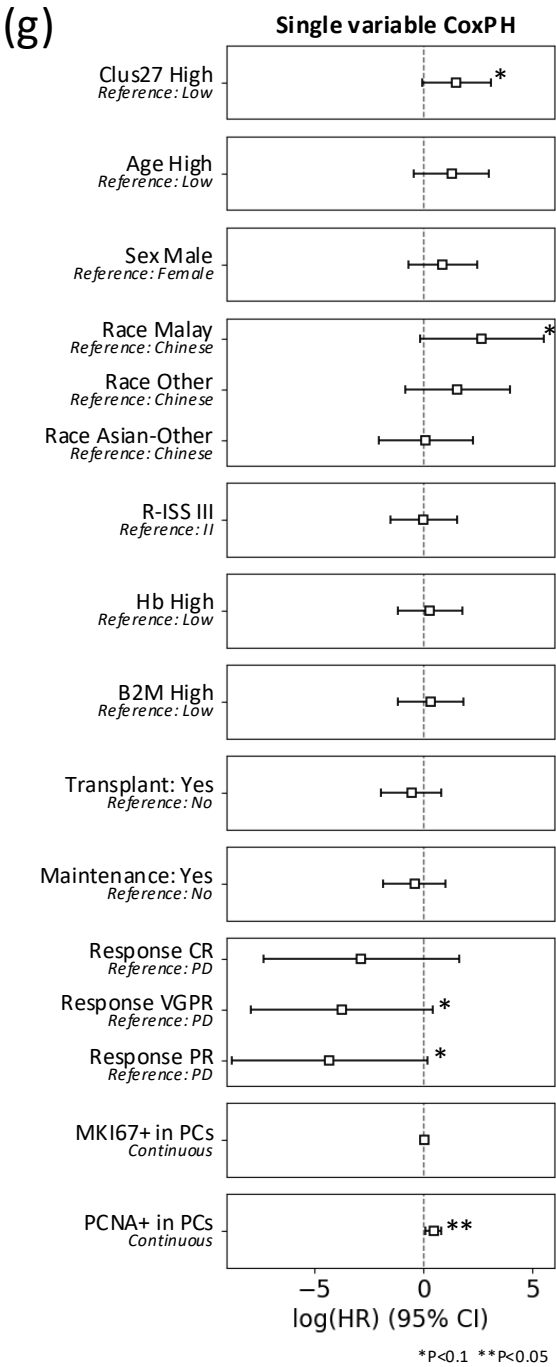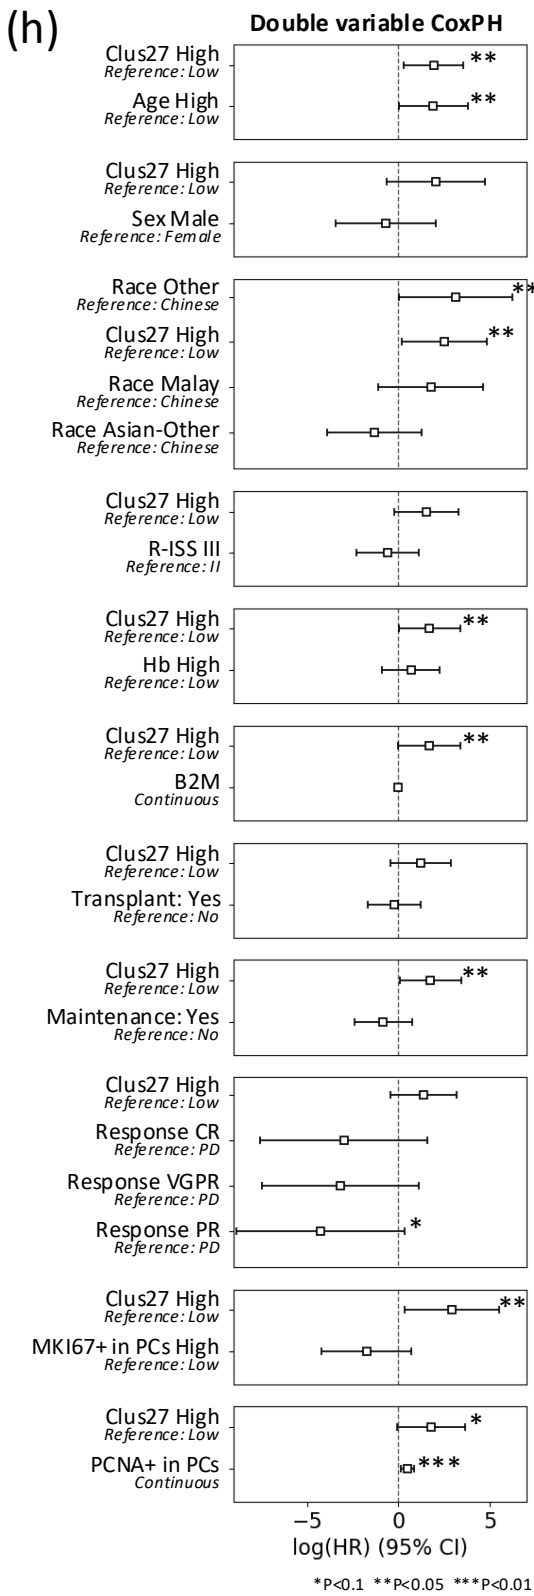

**Supplementary Figure 3 (accompanies Figure 3). (a)** Clustering of discovery cohort at even finer resolution (54 clusters). The sole *CD8A*<sup>+</sup>*MKI67*<sup>+</sup> cluster (red box) consists of cells from the original Cluster 27, demonstrating that Cluster 27 cells comprise the only subpopulation of *CD8A*<sup>+</sup>*MKI67*<sup>+</sup> cells.

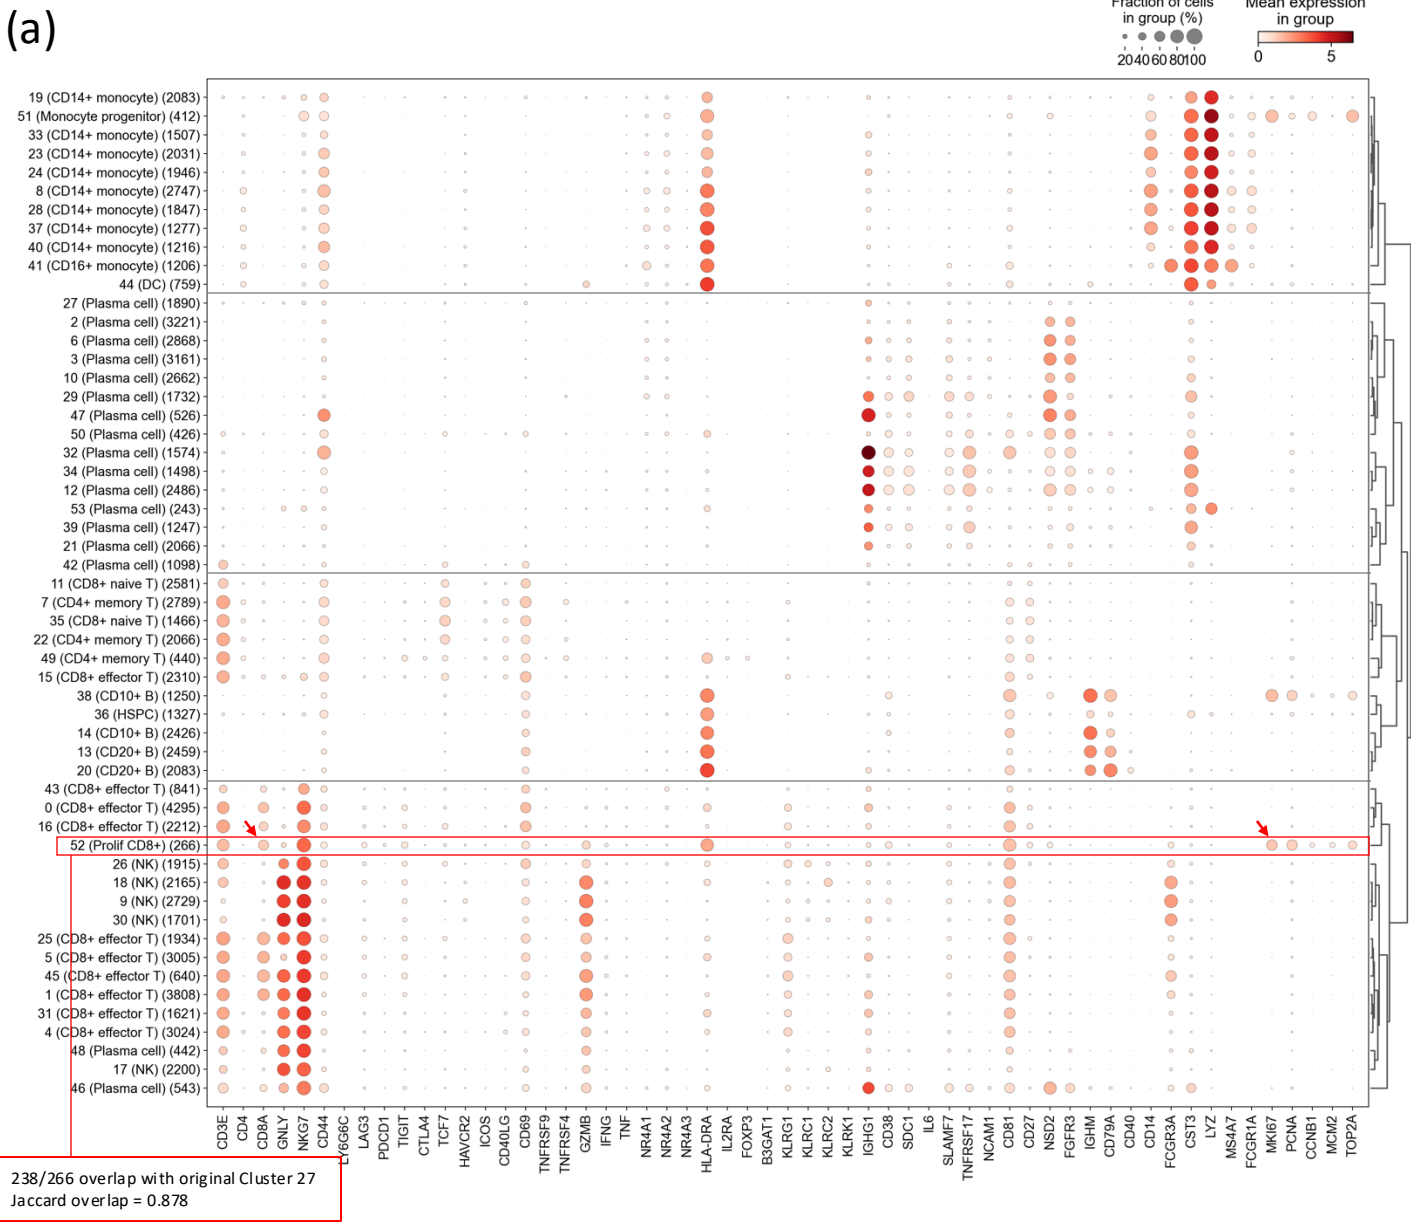

**Supplementary Figure 3 (continued). (b)** UMAPs showing Cluster 27 cells (left), *CD8A*<sup>+</sup>*MKI67*<sup>+</sup> cells (middle), and *CD8A*(prot)<sup>+</sup>*MKI67*<sup>+</sup> cells (right), among representative Clus27 High and Clus27 Low samples. The signature-positive cells (*CD8A*<sup>+</sup>*MKI67*<sup>+</sup> and *CD8A*(prot)<sup>+</sup>*MKI67*<sup>+</sup> cells) mostly overlap with Cluster 27 cells, albeit with some false positives scattered among other cell types. In Clus27 Low samples, a larger proportion of signature-positive cells constitute false positives, contributing an outsized detrimental effect on the overlap.

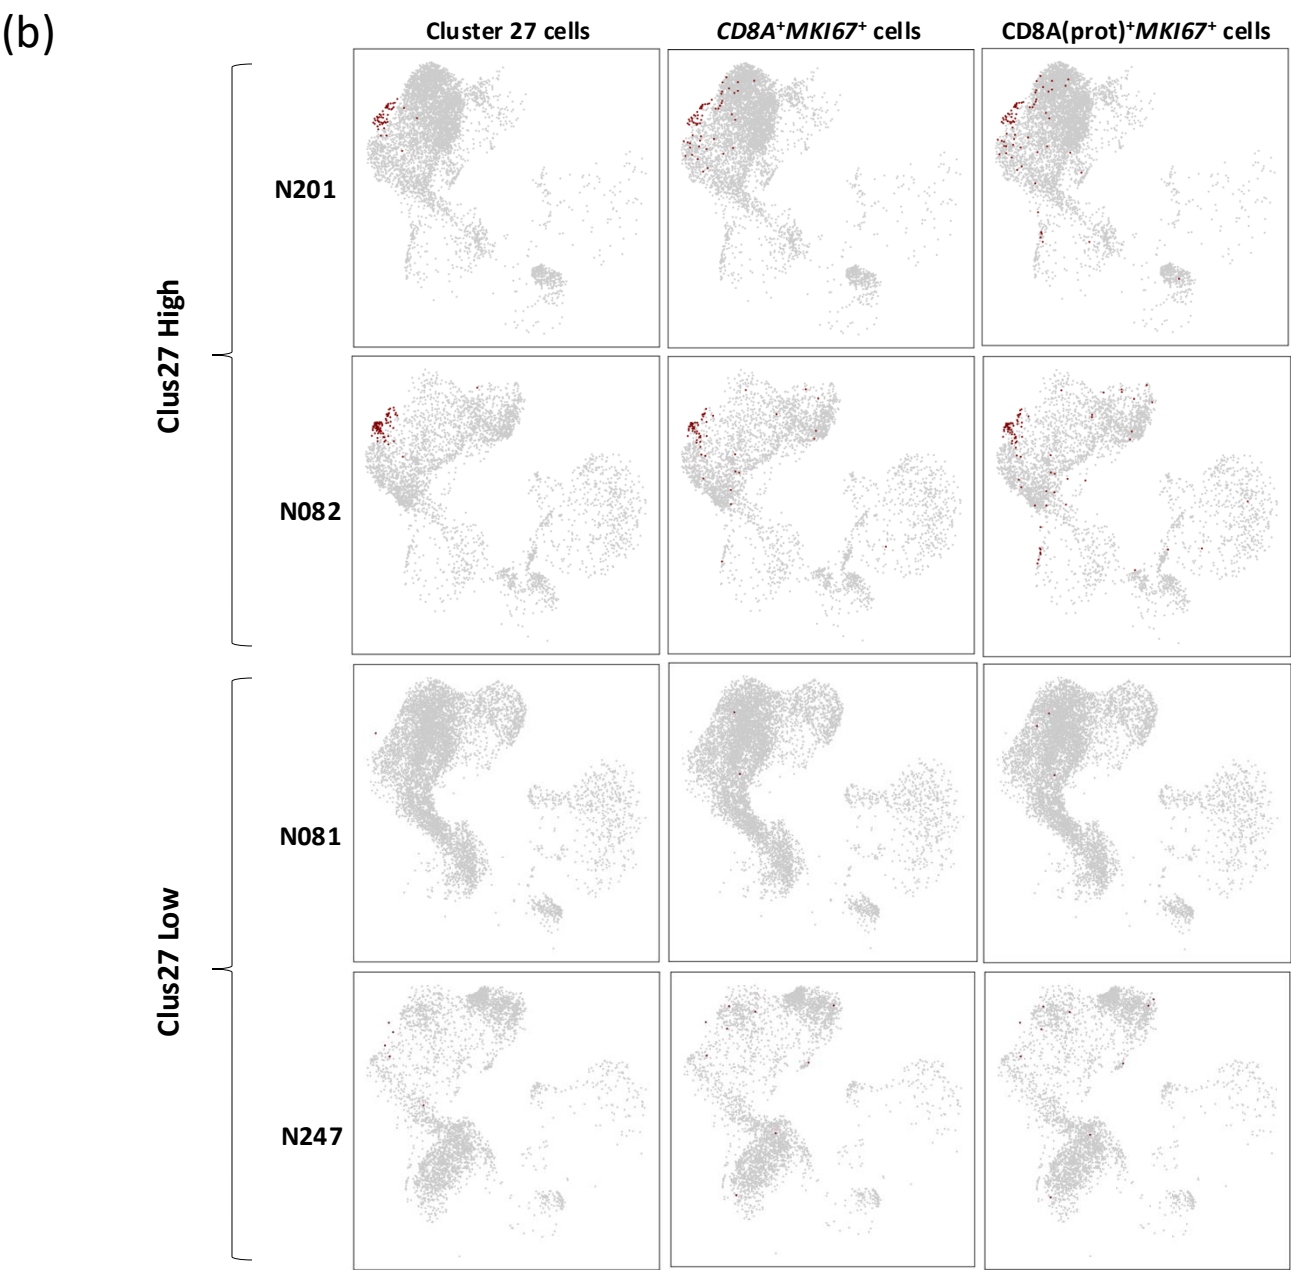



**Supplementary Figure 3 (continued).** **(c)** Jaccard overlap score between  $CD8A^{+}MKI67^{+}$  cells and Cluster 27 cells in each sample, as a function of the percentage of Cluster 27 cells in the TME. Samples with lower percentage of Cluster 27 cells have lower overlap score. **(d)** Precision and recall of  $CD8A^{+}MKI67^{+}$  signature in detecting Cluster 27 cells in each sample, as a function of the percentage of Cluster 27 cells in the TME. Samples with lower percentage of Cluster 27 cells have lower precision and recall. **(e)** Same as (c) but with protein signature  $CD8A(prot)^{+}MKI67^{+}$ . **(f)** Percentage of  $CD8A(prot)^{+}MKI67^{+}$  cells in TME correlates with percentage of Cluster 27 cells in TME, with perfect overlap between patient groupings by Clus27 and patient groupings by  $CD8A(prot)^{+}MKI67^{+}$  status. **(g)** Percentages of  $CD8A^{+}MKI67^{+}$  cells among TME cells in each sample of the validation cohort, stratified by data source, R-ISS stage, and cytogenetic abnormalities.

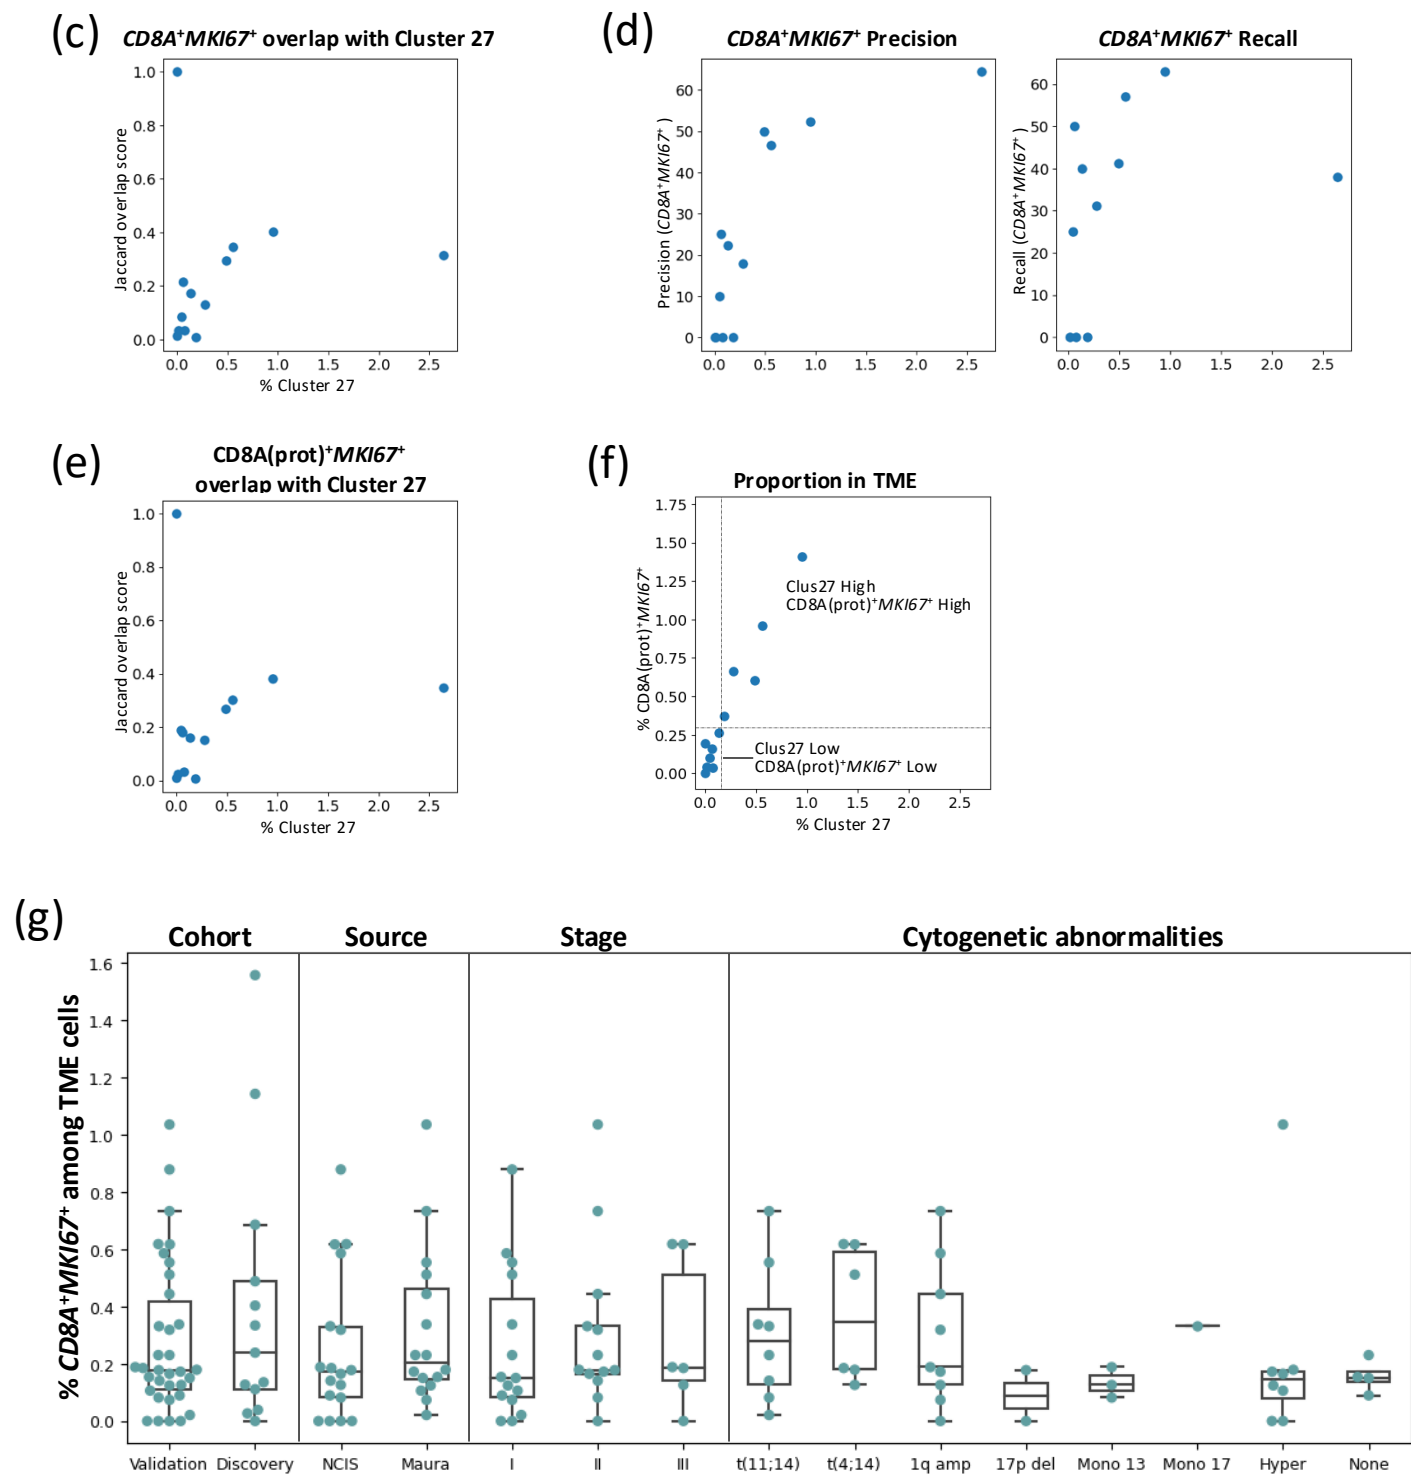

**Supplementary Figure 3 (continued).** (h) UMAPs showing  $CD8A^+MKI67^+$  cells in representative  $CD8A^+MKI67^+$  High and Low samples. The  $CD8A^+MKI67^+$  High samples have more  $CD8A^+MKI67^+$  cells that are clustered together, whereas the  $CD8A^+MKI67^+$  Low samples have more  $CD8A^+MKI67^+$  cells that are scattered randomly. (i) KM survival analyses of  $CD8A^+MKI67^+$  High and Low groups with different cut-offs to split patients into groups. (j) Negative control KM survival analyses of  $CD8A^+MKI67^+$  and  $CD8A^+PCNA^+$  High and Low groups. A range of cut-offs were tested and none showed association with PFS; only representative analyses showed here.

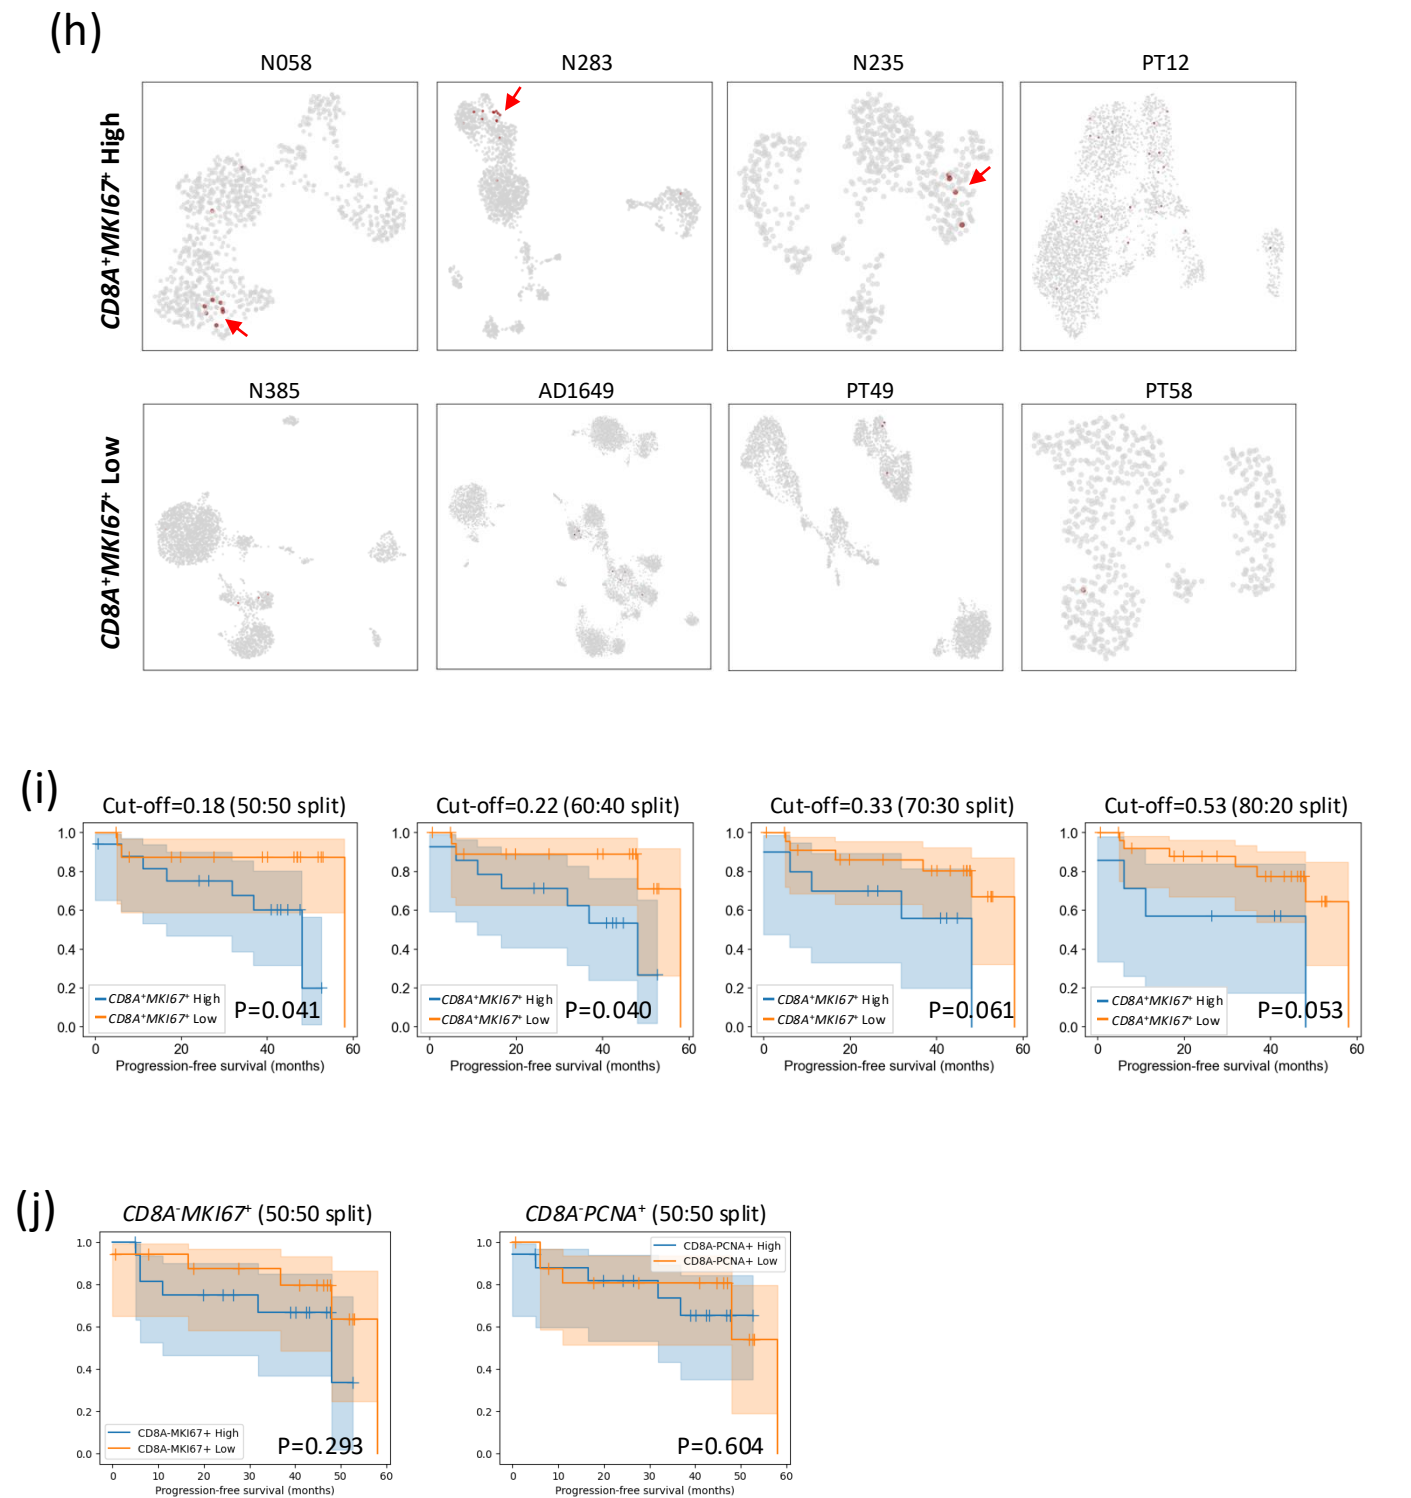

**Supplementary Figure 3 (continued). (k)** Single-variable and **(l)** double-variable survival analyses with the CoxPH model, for available covariates. Each covariate was evaluated with *CD8A<sup>+</sup>MKI67<sup>+</sup>* status for the double-variable analyses. Covariates with  $P < 0.1$  in single or double-variable analysis were selected for multivariable analysis.

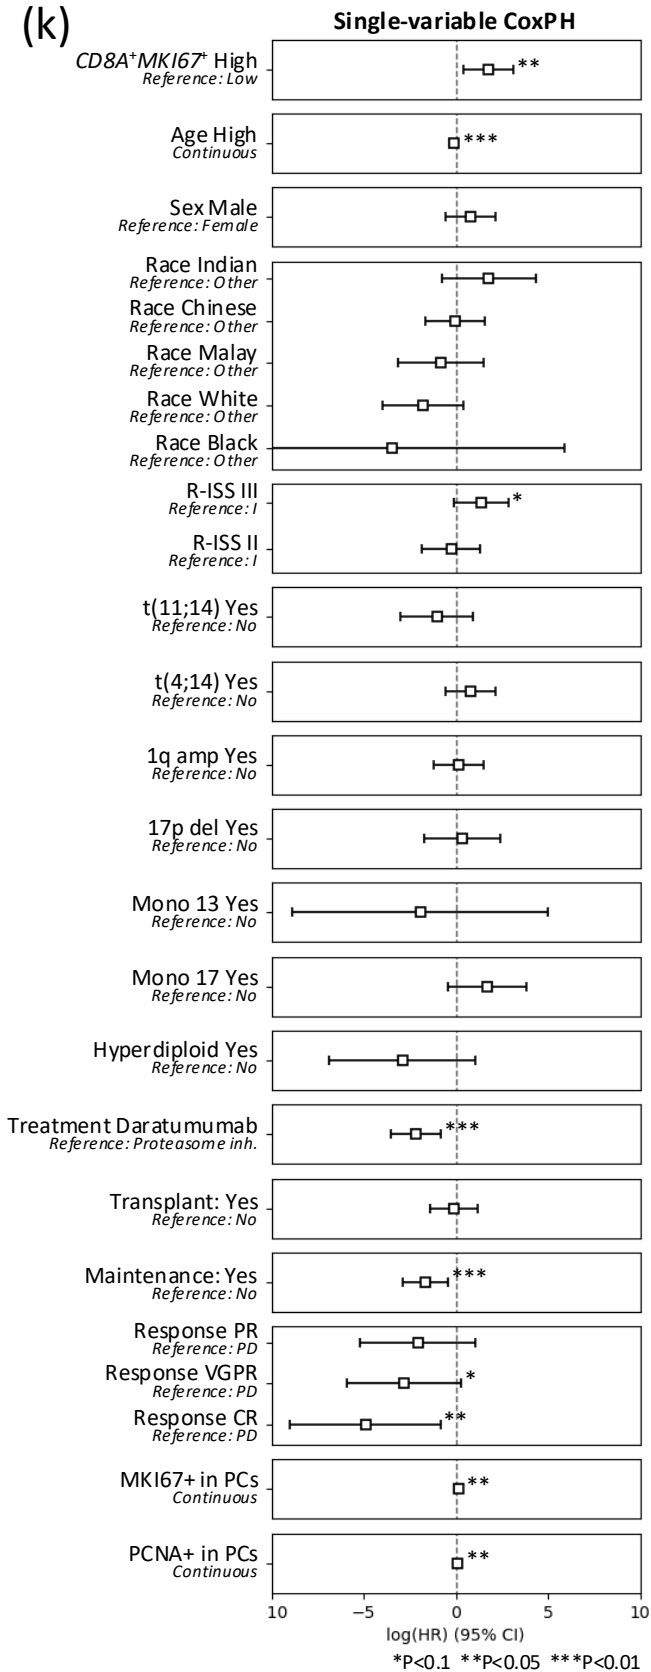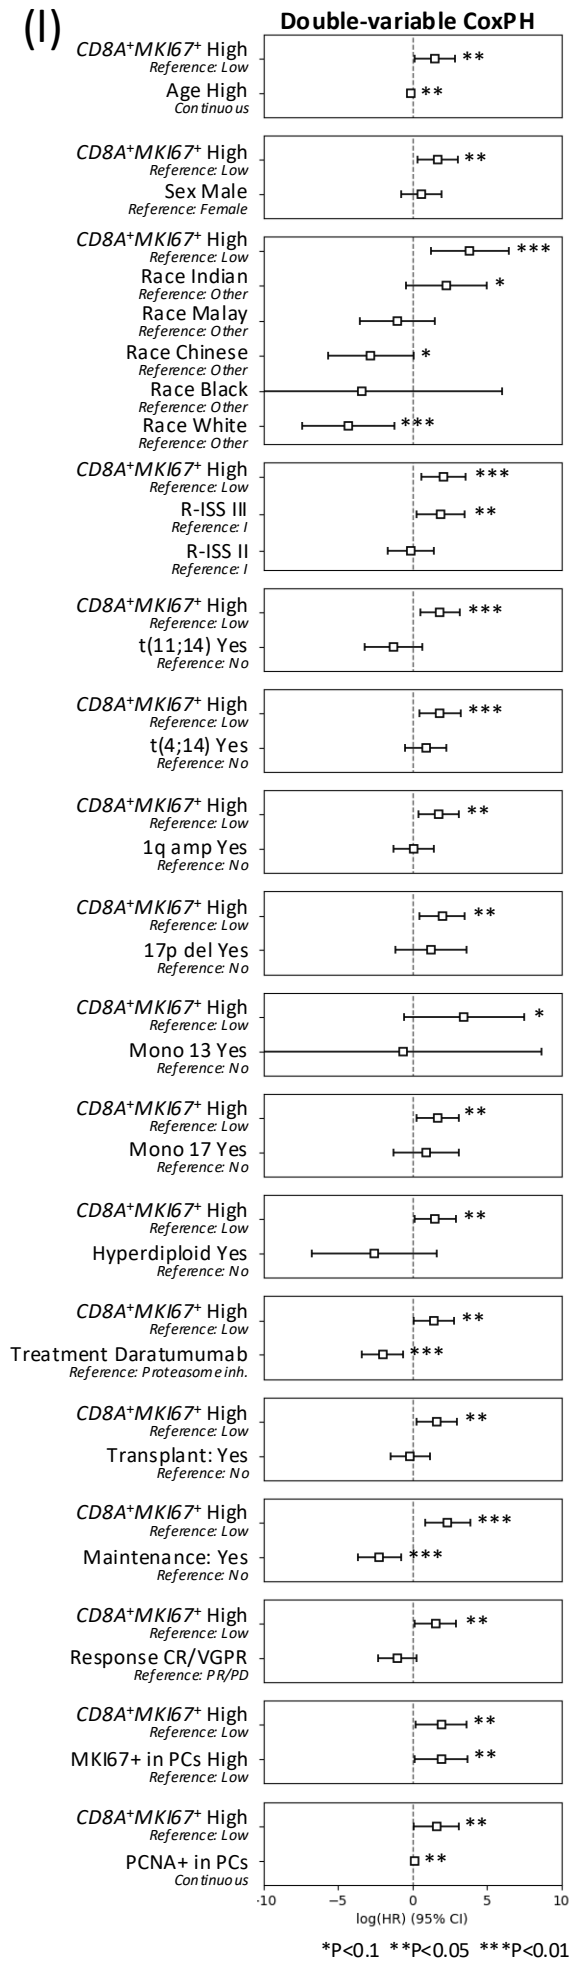

**Supplementary Figure 4 (accompanies Figure 4).** (a) Percentages of CD8<sup>+</sup>Ki67<sup>+</sup> cells among TME cells, and (b) Ki67<sup>+</sup> cells among PCs, in each sample of the TMA cohort stratified by R-ISS stage and cytogenetic abnormalities. (c) Histogram of CD8<sup>+</sup> Ki67<sup>+</sup> cells among TME cells, in percentage and log-percentage scales.

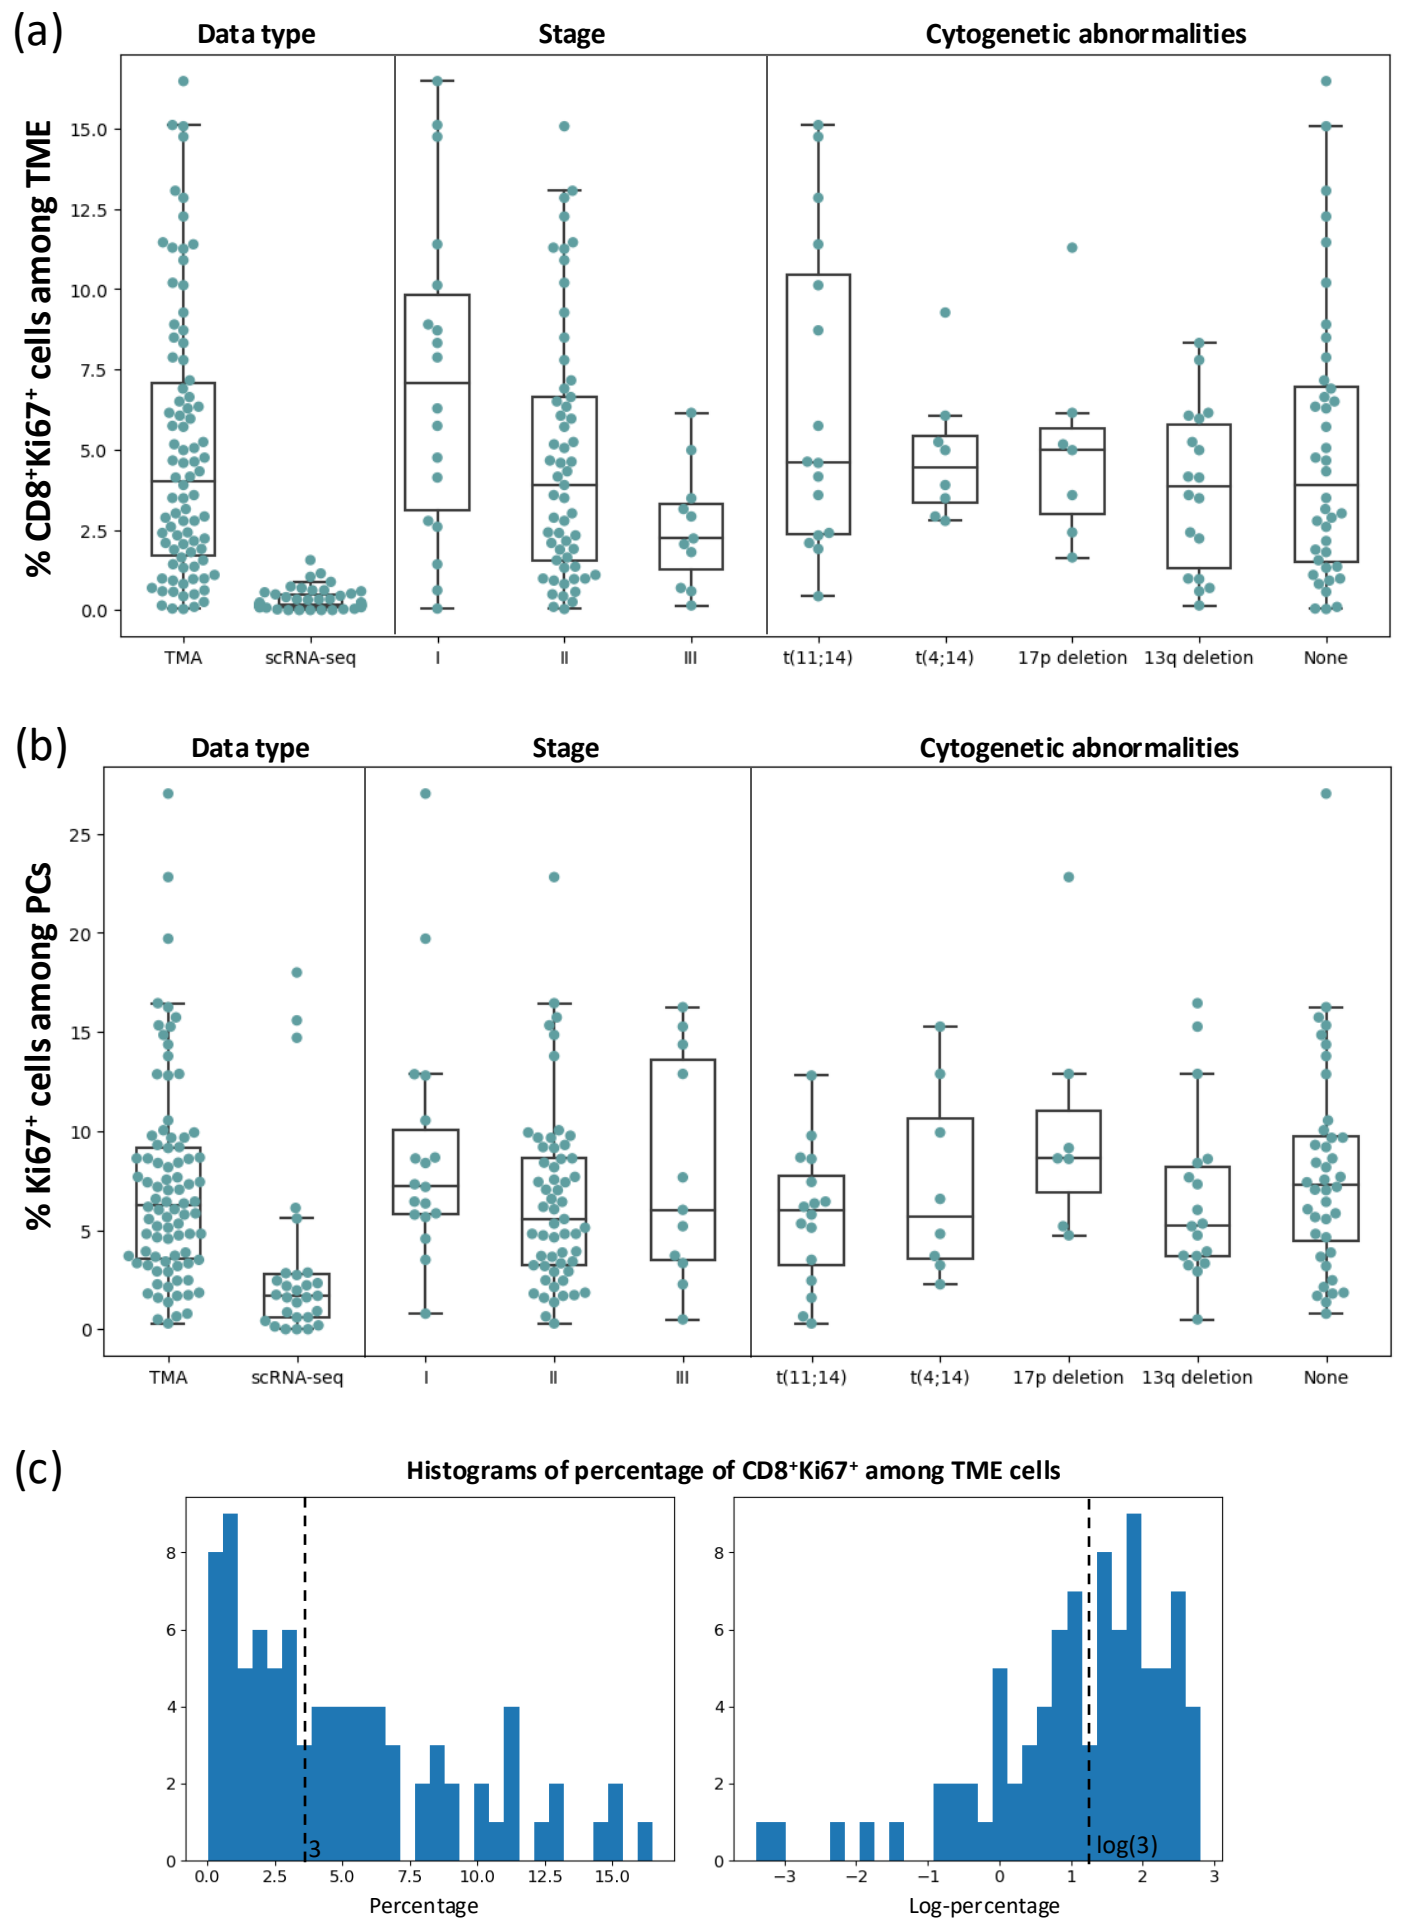

**Supplementary Figure 4 (continued). (d)** KM survival analyses of CD8<sup>+</sup>Ki67<sup>+</sup> High and Low groups with different cut-offs to split patients. **(e)** Negative control KM survival analyses of CD8<sup>+</sup>Ki67<sup>+</sup> among TME cells, and Ki67<sup>+</sup> among all cells, show that neither are associated with PFS. A range of cut-offs were tested and none showed association with PFS; only representative analyses showed here. **(f)** KM survival analyses of the PC proliferative index (Ki67<sup>+</sup> among PCs).

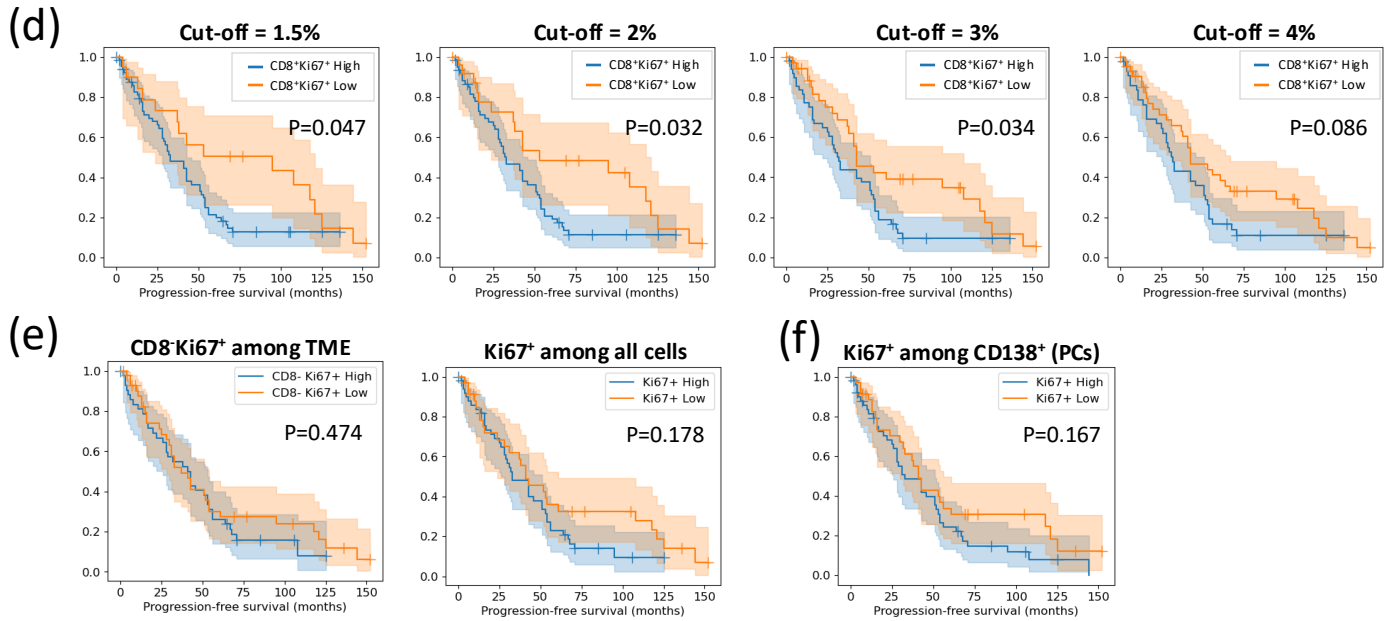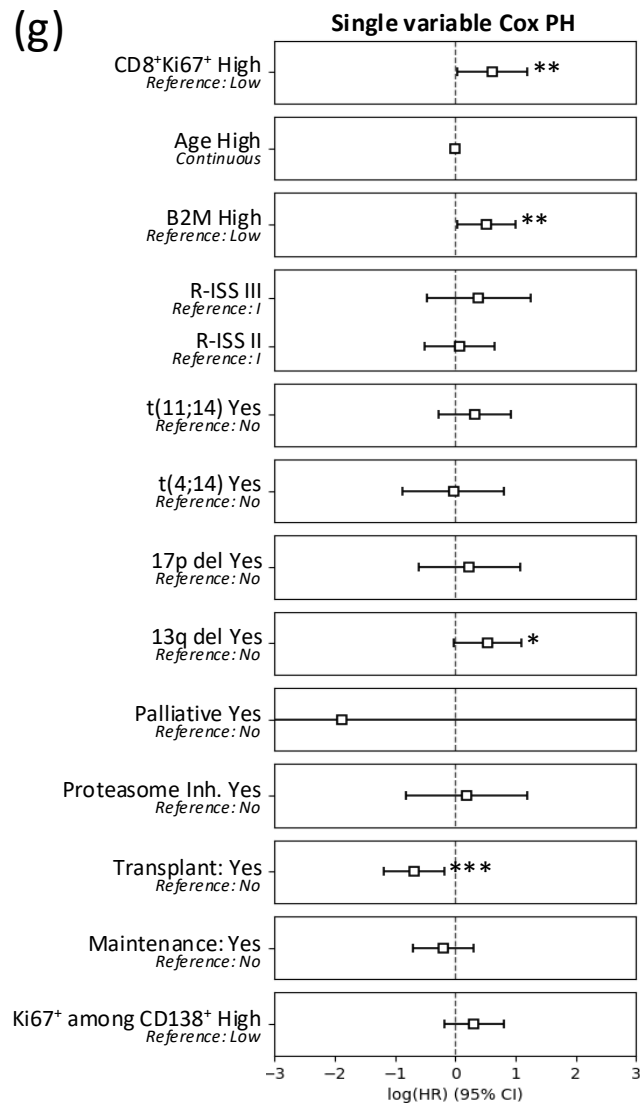

\* $P<0.1$  \*\* $P<0.05$  \*\*\* $P<0.01$

**Supplementary Figure 4 (continued). (g)** Single-variable and **(h)** double-variable survival analyses with the CoxPH model, for available covariates. Each covariate was evaluated with CD8<sup>+</sup>Ki67<sup>+</sup> status for the double-variable analyses. Covariates with P<0.1 in single or double-variable analysis were selected for multivariable analysis. **(i)** CoxPH forest plots for multivariable survival analyses of prognostic markers (CD8<sup>+</sup>Ki67<sup>+</sup> status, R-ISS, PC proliferative index) and other relevant covariates in the TMA cohort, and **(j)** Combined scRNA-seq data (pooled discovery and validation cohorts). Relevant covariates were selected as those exhibiting association with PFS (CoxPH P<0.1) either individually or together with CD8<sup>+</sup>Ki67<sup>+</sup> status.

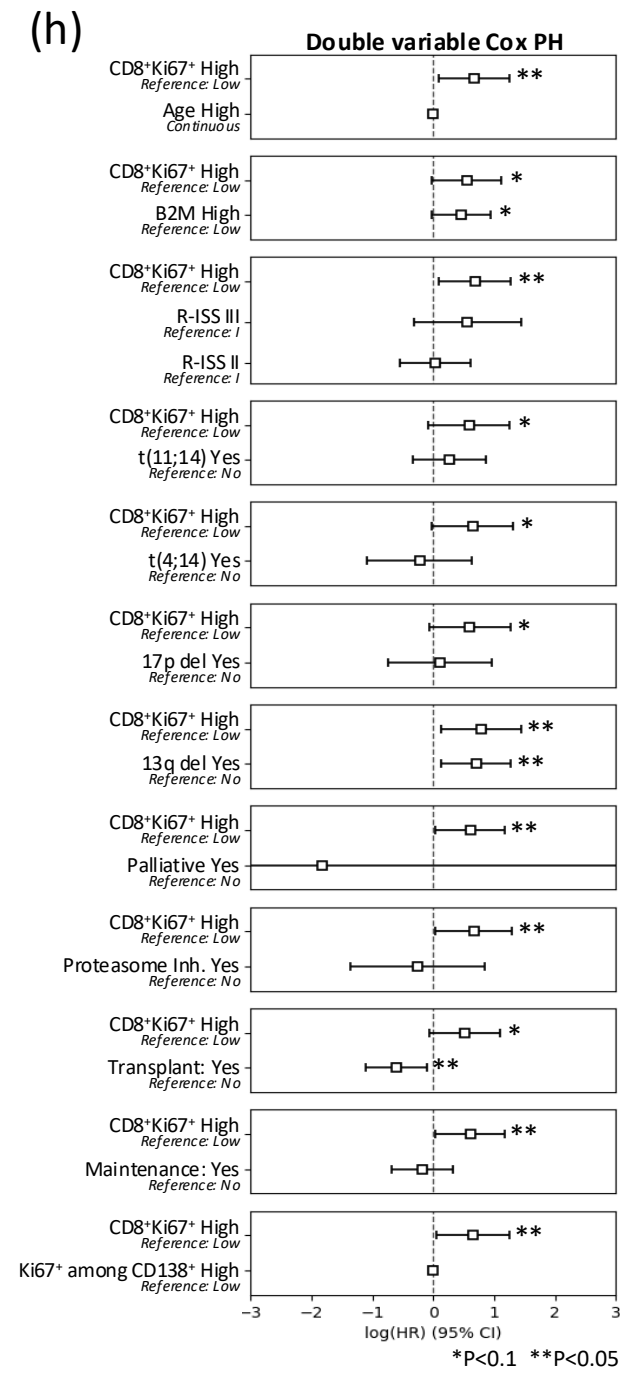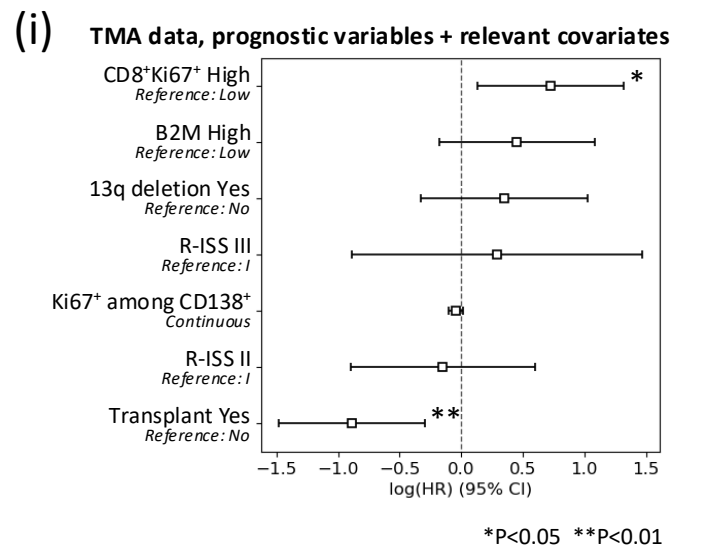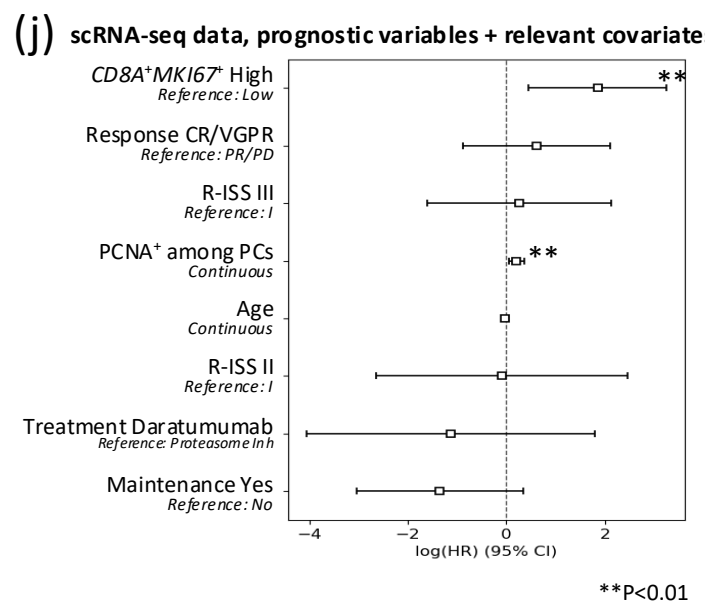

**Supplementary Figure 5 (accompanies Figure 5).** (a) Distances between proliferative CD8<sup>+</sup> cells, major immune cells types and myeloma PCs within 500μm, for Patient 1. (b) Distribution of Spearman rho correlation coefficients between the ordering of patients by percentage of CD8A<sup>+</sup>MKI67<sup>+</sup> among the TME cells from the original data, and from resampled TME cells in 1000 bootstrapping experiments. The ordering of patients in the resampled data were highly correlated with the original data, with rho>0.79 95% of the time. (c) Logrank P values for survival analyses of CD8A<sup>+</sup>MKI67<sup>+</sup> status from the resampled data. CD8A<sup>+</sup>MKI67<sup>+</sup> status was largely associated with worse PFS in the resampled data, with P<0.075 95% of the time. (d) Expression profiles of marker genes corresponding to that of Figure 1D of Li et al., 2019. Red boxes indicate genes whose expression appears different between our proliferative CD8<sup>+</sup> cells (green boxes) and the dysfunctional CD8 T cells of Li et al. 2019.

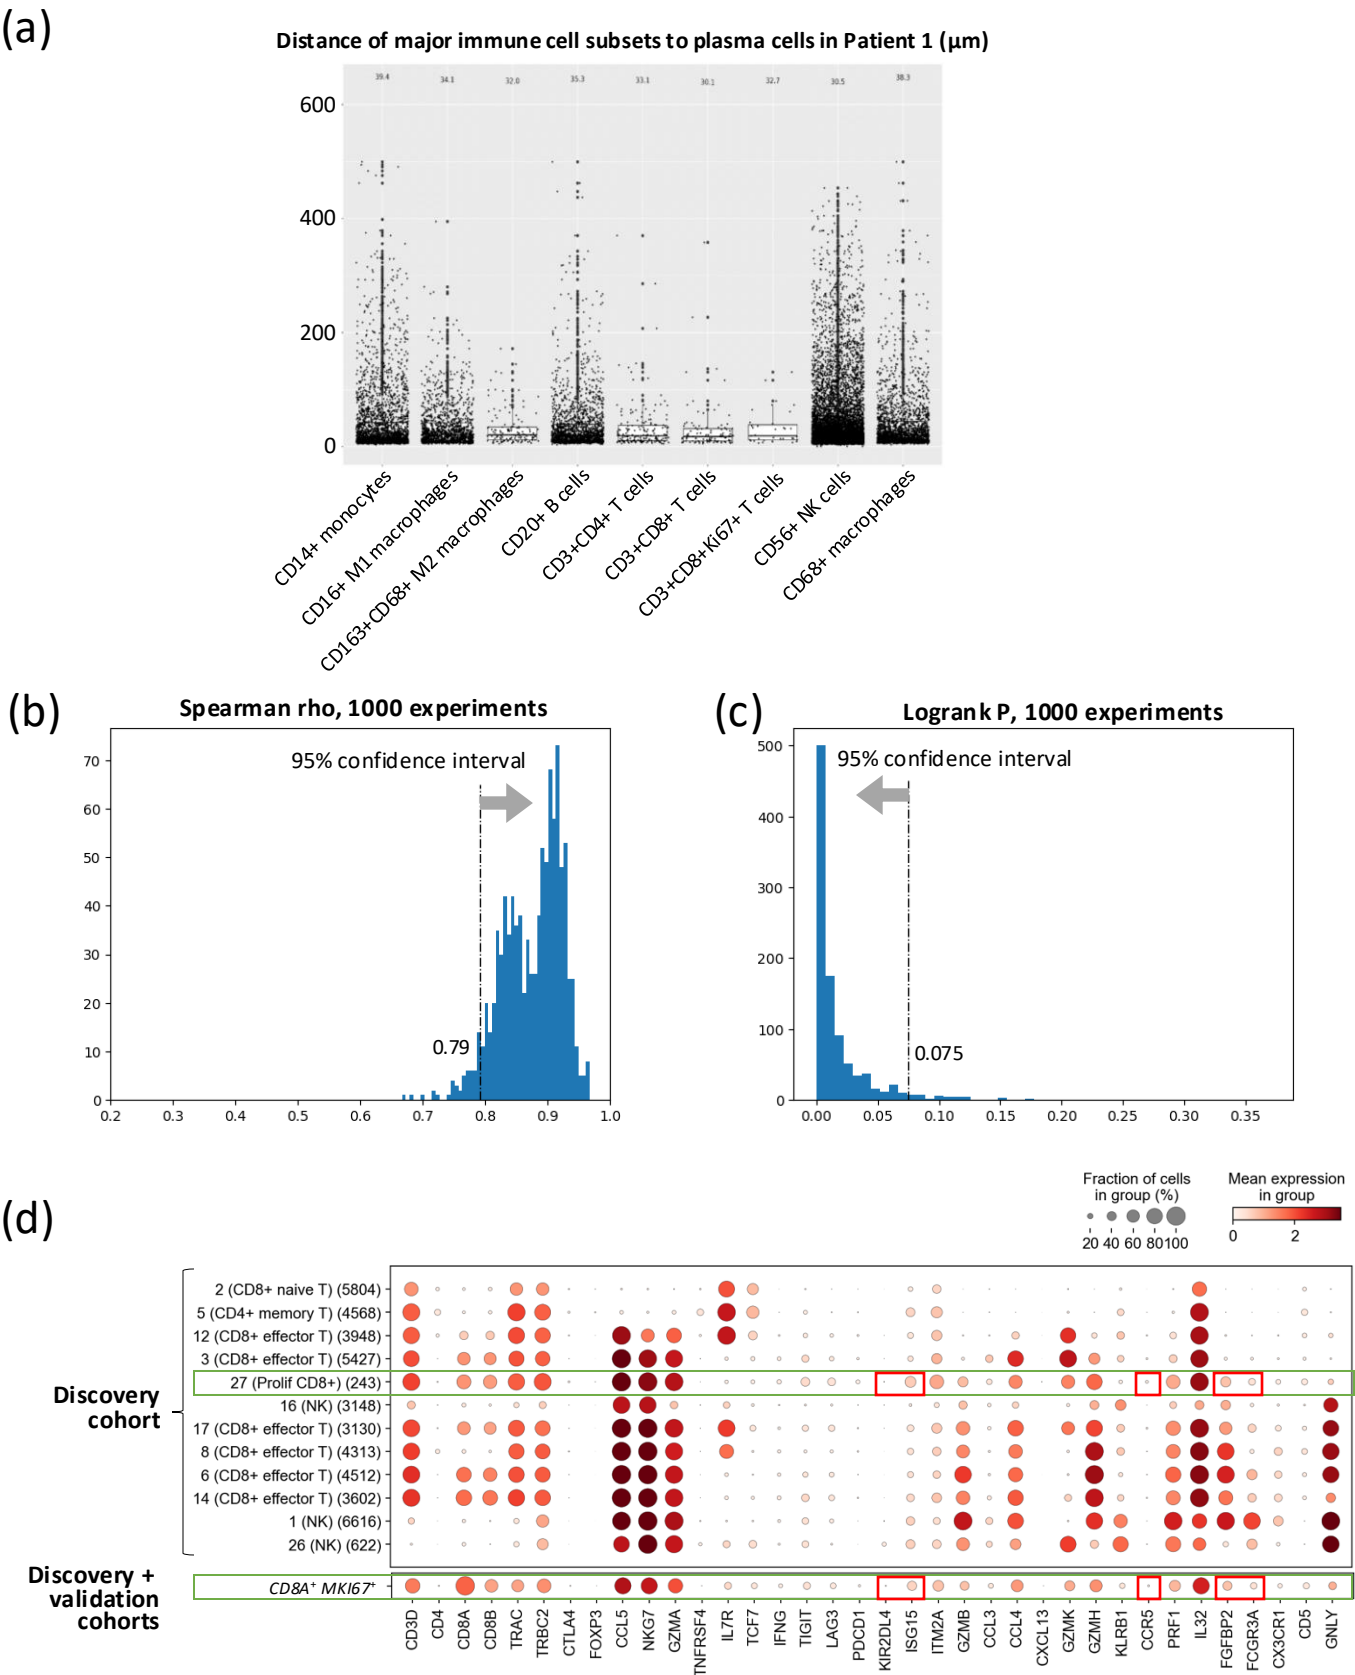

Supplement: Supplementary file 1 [file 638807df238acb32d15f012a.pdf]
