# Supplementary material for: Proliferative CD8 T-cells : A Novel Immune Microenvironmental Determinant of Outcomes in Multiple Myeloma
Source: Research Square preprint supplement (doi:10.21203/rs.3.rs-6929982/v1), 2025-07-03
Supplement: Supplementary file 1 [file 2899a93698cafc8e8b36d637.xlsx]

## Sheet: 1.CITE-seq
Supplementary Table 1. Full panel of antibodies used for CITE-Seq profiling.
id	name	read	pattern	sequence	feature_type
CD123	CD123_proteona	R2	^(BC)	CACACATC	Antibody Capture
CD137	CD137_proteona	R2	^(BC)	CATGGATC	Antibody Capture
TIM-3	TIM-3_proteona	R2	^(BC)	CCTATACC	Antibody Capture
CD63	CD63_proteona	R2	^(BC)	GCATAGTC	Antibody Capture
CD44	CD44_proteona	R2	^(BC)	TAGCAGGA	Antibody Capture
BCMA	BCMA_proteona	R2	^(BC)	CTGTTTAA	Antibody Capture
CD57	CD57_proteona	R2	^(BC)	AGCCTATC	Antibody Capture
CCR7	CCR7_proteona	R2	^(BC)	GTCCTGTT	Antibody Capture
CD11b	CD11b_proteona	R2	^(BC)	GAAGATCC	Antibody Capture
CD8a	CD8a_proteona	R2	^(BC)	GGTCGTAT	Antibody Capture
CD56	CD56_proteona	R2	^(BC)	CTGATGAG	Antibody Capture
CD45RA	CD45RA_proteona	R2	^(BC)	GCGTATCA	Antibody Capture
CD117	CD117_proteona	R2	^(BC)	TGTCGACT	Antibody Capture
CCR9	CCR9_proteona	R2	^(BC)	AGAAGGAC	Antibody Capture
CD11c	CD11c_proteona	R2	^(BC)	CACGTCTA	Antibody Capture
KLRG1	KLRG1_proteona	R2	^(BC)	CCTTCCAT	Antibody Capture
CD4	CD4_proteona	R2	^(BC)	TATCGCGA	Antibody Capture
CD3e	CD3e_proteona	R2	^(BC)	AGTCAGGT	Antibody Capture
CD38	CD38_proteona	R2	^(BC)	GGAATGTC	Antibody Capture
ICOS	ICOS_proteona	R2	^(BC)	AACGCCTT	Antibody Capture
TCRab	TCRab_proteona	R2	^(BC)	AGCCGTAA	Antibody Capture
CD19	CD19_proteona	R2	^(BC)	GTCTCATC	Antibody Capture					`
CD13	CD13_proteona	R2	^(BC)	ACTAGCTA	Antibody Capture
CD16	CD16_proteona	R2	^(BC)	TTCACGGA	Antibody Capture
HLA-DR	HLA-DR_proteona	R2	^(BC)	ATGGCGAT	Antibody Capture
CD33	CD33_proteona	R2	^(BC)	GCACACAA	Antibody Capture
CD45RO	CD45RO_proteona	R2	^(BC)	CATACGGA	Antibody Capture
CXCR4	CXCR4_proteona	R2	^(BC)	AGTGCATC	Antibody Capture
CD14	CD14_proteona	R2	^(BC)	CCGCTTAA	Antibody Capture
PD-1(CD279)	PD-1_proteona	R2	^(BC)	TTAATGCG	Antibody Capture
CD64	CD64_proteona	R2	^(BC)	TGTTCCGT	Antibody Capture
CD1c	CD1c_proteona	R2	^(BC)	CCACAACA	Antibody Capture
CD94	CD94_proteona	R2	^(BC)	AGGTTCCT	Antibody Capture
CD38FITC	CD38FITC_proteona	R2	^(BC)	TGGAAGCA	Antibody Capture
B7_INTEGRIN	B7_INTEGRIN_proteona	R2	^(BC)	ACGTCGTT	Antibody Capture
CD39	CD39_proteona	R2	^(BC)	ATGCCTAA	Antibody Capture
CD161	CD161_proteona	R2	^(BC)	CGGATCAA	Antibody Capture
CD196	CD196_proteona	R2	^(BC)	CGAAACGC	Antibody Capture
CD25	CD25_proteona	R2	^(BC)	CATCAAGT	Antibody Capture
CXCR1(cd181)	CXCR1_proteona	R2	^(BC)	CCAGTTGA	Antibody Capture
CD103	CD103_proteona	R2	^(BC)	AGAAGCCT	Antibody Capture
CD62L	CD62L_proteona	R2	^(BC)	TGAGCTGT	Antibody Capture
CD95	CD95_proteona	R2	^(BC)	CTTCCTTC	Antibody Capture
TCRgd	TCRgd_proteona	R2	^(BC)	AAGGCTCT	Antibody Capture
CD7	CD7_proteona	R2	^(BC)	CAGAGTGA	Antibody Capture
Vd2	Vd2_proteona	R2	^(BC)	AGAGGATG	Antibody Capture
CD69	CD69_proteona	R2	^(BC)	CAGTTAGT	Antibody Capture
CCR1	CCR1_proteona	R2	^(BC)	ACTCTGAG	Antibody Capture
Va7-2	Va7-2_proteona	R2	^(BC)	ATCCTGTA	Antibody Capture
CD127	CD127_proteona	R2	^(BC)	TAGCTTCC	Antibody Capture
CD27	CD27_proteona	R2	^(BC)	CCTGTCAA	Antibody Capture
TIGIT	TIGIT_proteona	R2	^(BC)	TAGGTGTT	Antibody Capture
CD319(SLAMF-7)	CD319_proteona	R2	^(BC)	ACTGACCT	Antibody Capture
CD81	CD81_proteona	R2	^(BC)	ATAGCACA	Antibody Capture
CD49a	CD49a_proteona	R2	^(BC)	GTCAACAG	Antibody Capture
CD194	CD194_proteona	R2	^(BC)	TAGCAACT	Antibody Capture
CD152(ctla4)	CTLA4_proteona	R2	^(BC)	TCACTCGA	Antibody Capture
CD15	CD15_proteona	R2	^(BC)	CTGGCGAT	Antibody Capture
CD83	CD83_proteona	R2	^(BC)	GTGGTATG	Antibody Capture
CD138(M15)	CD138_proteona	R2	^(BC)	GTACGCGA	Antibody Capture
CD28	CD28_proteona	R2	^(BC)	CATTCGTC	Antibody Capture
CD185	CD185_proteona	R2	^(BC)	GCAAGTAC	Antibody Capture
CCR2	CCR2_proteona	R2	^(BC)	GATGGAGT	Antibody Capture
CD45	CD45_proteona	R2	^(BC)	ACTATCGC	Antibody Capture

## Sheet: 2.Patients_sc
Supplementary Table 2. Patient characteristics for single-cell sequencing dataset (discovery and validation cohorts).
Study ID	Dataset	Cohort	Type	Age at Diagnosis	Sex	Race	R-ISS	t(11;14)	t(4;14)	1q amplification	17p deletion	Monosomy 13	Monosomy 17	Hyperdiploid	Hb (g/dl)	B2M (mg/l)	Daratumumab	Proteasome Inhibitor	Response	Transplant	Maintenance	Perc_Clus27_TME	Perc_Genesig_TME	Perc_Protsig_TME	Perc_MKI67_PC	Perc_PCNA_PC	PFS	Event (relapse)
N020	414	Discovery	MM	56	Male	Chinese	3	0	1	0	0	0	0	0	10.5	33.084	0	1	VGPR	1	1	0.489772	0.403342	0.605013	1.73605	1.86561	35.23	1
N022	414	Discovery	MM	48	Male	Asian-Other	3	0	1	0	0	0	0	0	8.3	7.238	0	1	PR	0	1	0.558392	0.686024	0.957243	2.21584	3.07755	54.4	1
N025	414	Discovery	MM	36	Female	Chinese		0	1	0	0	0	0	0	9.1	3.105	0	1	VGPR	1	0	0.044479	0.111198	0.100078	1.68539	3.93258	136.4	0
N072	414	Discovery	MM	57	Male	Chinese	3	0	1	0	0	0	0	0	8.3	7.258	0	1			0	0	0	0	1.3473	2.04591	119.17	0
N081	414	Discovery	MM	64	Female	Other	2	0	1	0	0	0	0	0	8.8	3.843	0	1	VGPR	0	0	0.013346	0.026692	0.040037	0	5.26316	20.5	1
N082	414	Discovery	MM	69	Male	Chinese	2	0	1	0	0	0	0	0	8.6	4.694	0	1	CR	0	0	2.64061	1.55796	2.37655	6.11961	2.50348	22.8	1
N122	414	Discovery	MM	61	Female	Chinese	2	0	1	0	0	0	0	0	10.1	4.328	0	1	VGPR	1	1	0.07758	0.03879	0.03879	0.854701	1.7094	151.8	0
N201	414	Discovery	MM	36	Male	Malay	3	0	1	0	0	0	0	0	8.7	8.276	0	1	VGPR	1	0	0.949534	1.14296	1.40672	0.59453	14.2687	10.83	1
N247	414	Discovery	MM	71	Female	Chinese	2	0	1	0	0	0	0	0	7.2	3.727	0	1	PR	0	1	0.132661	0.23879	0.265322	0.137552	3.37001	34.53	0
N253	414	Discovery	MM	65	Male	Chinese	2	0	1	0	0	0	0	0	9.5	3.582	0	1	VGPR	1	1	0	0.135423	0.193461	0.41841	13.3891	16.7	1
N297	414	Discovery	MM	65	Female	Chinese	3	0	1	0	0	0	0	0	8.1	18.148	0	1	VGPR	1	0	0.063532	0.127065	0.158831	0.60241	6.92771	25.6	0
N302	414	Discovery	MM	62	Male	Chinese		0	1	0	0	0	0	0			0	1	VGPR	1	0	0.185529	0.333952	0.371058	14.7059	5.88235	26.2	1
N349	414	Discovery	MM	81	Female	Chinese	3	0	1	0	0	0	0	0	8.5	7.546	0	1	PD	0	0	0.279086	0.4884	0.662829	2.73478	16.1507	2.17	1
BM6	Control	Discovery	Control																			0	0.046888	0.175829	1.28755	3.86266
BM19	Control	Discovery	Control																			0.039698	0.099246	0	4.61538	1.53846
N347	Dara	Validation	MM	47	Female	Chinese	2	1	0	0	0	0	1	0			1	0	VGPR	1	1		0.331126	0.331126	0.913242	13.1507	16.57	1
N364	Dara	Validation	MM	69	Male	Chinese	2	0	0	1	0	0	0	1			1	0	VGPR	1	1		0	0	2.85714	5.71429	52.57	0
N366	Dara	Validation	MM	80	Female	Chinese	2	1	0	0	0	1	0	0			1	0	VGPR		1		0.0819	0.0819	0.192678	14.8362	51.8	0
N374	Dara	Validation	MM	84	Male	Chinese	3	0	0	1	0	1	0	0			1	0		0	0		0.188235	0.188235	1.60237	11.1573	0.6	0
N385	Dara	Validation	MM	72	Female	Malay	3	0	1	1	0	1	0	0			1	0	CR		1		0.126103	0.025221	1.60772	4.50161	46.17	0
N392	Dara	Validation	MM	65	Male	Malay	2	0	0	0	0	0	0	1			1	0	VGPR	1	1		0.165017	0.041254	2.18068	6.54206	47.7	0
N395	Dara	Validation	MM	60	Male	Asian-Other	1	0	0	0	0	0	0	1			1	0	PR	1	0		0	0	0	6.97674	7.87	0
N396	Dara	Validation	MM	69	Male	Chinese	2	0	0	1	0	0	0	0			1	0	VGPR	1	1		0.318674	0.318674			36.8	1
N446	Dara	Validation	MM	61	Male	Chinese	1	0	0	0	0	0	0	0			1	0	VGPR	1	1		0.089405	0			27.63	0
AD1649	Dara	Validation	MM	62	Female	Chinese	2	1	0	0	0	0	0	0			1	0	VGPR	0	1		0.140924	0.140924			17.63	0
N018	Cinnie	Validation	MM	62	Male	Malay	2	0	0	0	1		0	0			0	1	PR	1	0		0.177936		0	7.01754	58	1
N058	Cinnie	Validation	MM	49	Male	Chinese	1	0	0	0	0		0	0			0	1	PR	1	1		0.878906		1.95911	7.62351	48	1
N124	Cinnie	Validation	MM	33	Male	Asian-Other	3	0	1	0	0		0	0			0	1	VGPR	1	1		0.18498		2.45023	4.74732	48	1
N171	Cinnie	Validation	MM	41	Male	Asian-Other	1	0	0	0	0		0	0			0	1	PR	0	0		0		18	30.3333	5	1
N173	Cinnie	Validation	MM	65	Male	Chinese	3	0	1	0	0		0	0			0	1	PR	0	0		0.617284		15.5844	18.1818	6	1
N210	Cinnie	Validation	MM	48	Female	Indian	3	0	0	0	1		0	0			0	1	PR	0	0		0		2.32558	18.2171	6	1
N235	Cinnie	Validation	MM	43	Male	Chinese	3	0	1	0	0		0	0			0	1	VGPR	1	0		0.618238		2.82686	3.18021	11	1
N283	Cinnie	Validation	MM	33	Female	Malay	1	0	0	1	0		0	0			0	1	PD	0	0		0.586019		5.58659	7.82123	0	1
PT03	Maura	Validation	MM	57	Male	White	2	0	1	0	0	0	0	1			1	0	CR	1	0		0.179211				47.64	0
PT11	Maura	Validation	MM	66	Female	White	1	1	0	0	0	0	0	0			1	0	VGPR	0	1		0.554017				26.4	0
PT12	Maura	Validation	MM	39	Female	White	1	0	1	0	0	0	0	0			1	0	PR	1	1		0.511578				24.12	0
PT13	Maura	Validation	MM	65	Female	White	2	0	0	1	0	0	0	1			1	0	VGPR	0	1		0.172414				19.8	0
PT18	Maura	Validation	MM	50	Male	White	1	1	0	0	0	0	0	0			1	0	VGPR	0	1		0.33761				44.76	0
PT30	Maura	Validation	MM	64	Male	White	2	1	0	0	0	0	0	0			1	0	CR	0	1		0.230415				52.68	0
PT32	Maura	Validation	MM	55	Female	White	2	1	0	1	0	0	0	0			1	0	CR	0	1		0.733368				42.36	0
PT33	Maura	Validation	MM	57	Female	White	2	0	0	0	0	0	0	1			1	0	CR	0			1.03601				40.92	0
PT39	Maura	Validation	MM	61	Female	White	1	0	0	0	0	0	0	1			1	0	VGPR	0	1		0.106135				38.88	0
PT49	Maura	Validation	MM	65	Female	White	1	0	0	0	0	0	0	1			1	0	CR	0	1		0.124285				40.08	0
PT55	Maura	Validation	MM	54	Male	White	2	0	0	1	0	0	0	0			1	0	VGPR	0	1		0.443686				31.8	1
PT58	Maura	Validation	MM	70	Female	White	1	0	0	0	0	0	0	0			1	0	VGPR	0	1		0.153846				46.92	0
PT59	Maura	Validation	MM	47	Female	Asian-Other	1	0	0	0	0	0	0	0			1	0	CR	0	1		0.230326				43.08	0
PT63	Maura	Validation	MM	68	Female	White	1	1	0	0	0	0	0	0			1	0	CR	0	0		0.020934				4.8	0
PT78	Maura	Validation	MM	55	Female	Black	1	0	0	1	0	0	0	0			1	0	VGPR	1	1		0.073828				52.92	0
PT85	Maura	Validation	MM	46	Female		1	0	0	0	0	0	0	0			1	0	PR	0	1		0.150351				47.04	0

## Sheet: 3a.Survival_discovery
Supplementary Table 3a. Survival analyses for discovery cohort.
	Kaplan-Meier estimate						Cox proportional hazards model
	Clus27 and CD8A+MKI67+						Cox proportional hazards model: Single variable. Clus27 status obtained by 50:50 split of samples					Cox proportional hazards model: 2 variables (Clus27 & other variable). Clus27 status obtained by 50:50 split of samples					Cox proportional hazards model: Multivariable (variables with P<.1 in single or 2-var analyses).
		Median PFS	P (logrank test)					exp(coef)	P	Note			exp(coef)	P	Note			exp(coef)	P	Note
	Clus27 = High	26.2 [2.17 - 54.4]	0.0388				Clus27=High	4.548 [0.935 - 22.126]	0.0606	*		Clus27=High	6.817 [1.341 - 34.653]	0.0207	**		Clus27=High	15.509 [1.832 - 131.318]	0.0119	**
	Clus27 = Low	inf [16.7 - inf]										Age=High	6.707 [1.026 - 43.823]	0.0469	**		Age=High	8.435 [0.651 - 109.338]	0.103
	(50:50 split of samples)																Race=Other (vs Chinese)	12.226 [0.642 - 232.808]	0.0959
							Age=High	3.617 [0.639 - 20.471]	0.146								Race=Asian-Other (vs Chinese)	0.339 [0.007 - 17.091]	0.588
												Clus27=High	7.637 [0.518 - 112.707]	0.139			Race=Malay (vs Chinese)	2.923 [0.059 - 144.593]	0.59
	CD8A+MKI67+ = High	26.2 [2.17 - 54.4]	0.0388									Sex=Male	0.501 [0.032 - 7.751]	0.621			Response=CR/VGPR (vs PR/PD)	1.215 [0.057 - 25.765]	0.901
	CD8A+MKI67+ = Low	inf [16.7 - inf]					Sex=Male	2.421 [0.5 - 11.716]	0.272								PCNA+ among PCs (continuous)	1.458 [1.102 - 1.93]	0.00834	***
	(50:50 split of samples, cut-off=0.3)
												Clus27=High	12.302 [1.194 - 126.749]	0.035
							Race=Other (vs Chinese)	4.784 [0.435 - 52.651]	0.201			Race=Other (vs Chinese)	22.558 [1.019 - 499.616]	0.0487	**
	CD8A(prot)+MKI67+ = High	26.2 [2.17 - 54.4]	0.0388				Race=Asian-Other (vs Chinese)	1.117 [0.129 - 9.699]	0.92			Race=Asian-Other (vs Chinese)	0.266 [0.02 - 3.508]	0.314
	CD8A(prot)+MKI67+ =Low	inf [16.7 - inf]					Race=Malay (vs Chinese)	14.589 [0.844 - 252.119]	0.0653	*		Race=Malay (vs Chinese)	5.856 [0.334 - 102.529]	0.226			For variables with alternative encodings (eg. continuous vs categorical for Clus27, Age, Hb, B2M, MKI67+ among PCs, PCNA+ among PCs; or merged categories for Response), we show the result for the encoding with the best model log-likelihood P value.
	(50:50 split of samples, cut-off=0.3)
							R-ISS=III (vs II)	1.013 [0.223 - 4.603]	0.986			Clus27=High	4.63 [0.794 - 27.001]	0.0885
												R.ISS=III (vs II)	0.548 [0.101 - 2.987]	0.487
	PC proliferative index						Hb=High	1.36 [0.305 - 6.064]	0.687
		Median PFS	P (logrank test)									Clus27=High	5.44 [1.012 - 29.234]	0.0483	**
	MKI67+ among PCs = High	35.23 [2.17 - inf]	0.503									Hb=High	1.959 [0.414 - 9.266]	0.396
	MKI67+ among PCs = Low	inf [10.83 - inf]					B2M=High	1.41 [0.317 - 6.266]	0.652
	(50:50 split of samples)
												Clus27=High	5.34 [0.993 - 28.72]	0.051	*
	PCNA+ among PCs = High	20.5 [2.17 - 26.2]	0.00526				Transplant=Yes	0.574 [0.144 - 2.295]	0.432			B2M (continuous)	0.978 [0.9 - 1.063]	0.601
	PCNA+ among PCs = Low	inf [22.8 - inf]
	(50:50 split of samples)
							Maintenance=Yes	0.672 [0.16 - 2.814]	0.586			Clus27=High	3.336 [0.65 - 17.123]	0.149
												Transplant=Yes	0.796 [0.188 - 3.37]	0.757
	Negative control experiments: Other proliferative cells						Response=CR (vs PD)	0.058 [0.001 - 5.14]	0.213
		Median PFS	P (logrank test)				Response=VGPR (vs PD)	0.024 [0 - 1.522]	0.0781	*		Clus27=High	5.678 [1.059 - 30.437]	0.0427	**
	CD8A-MKI67+ among TME = High	54.4 [22.8 - inf]	0.434				Response=PR (vs PD)	0.013 [0 - 1.18]	0.0592	*		Maintenance=Yes	0.437 [0.089 - 2.135]	0.306
	CD8A-MKI67+ among TME = Low	20.5 [2.17 - inf]
	(50:50 split of samples)
							MKI67+ among PCs (continuous)	1.06 [0.913 - 1.23]	0.443			Clus27=High	4 [0.656 - 24.396]	0.133
	CD8A- PCNA+ among TME = High	inf [16.7 - inf]	0.579									Response=CR (vs PD)	0.051 [0.001 - 4.938]	0.202
	CD8A- PCNA+ among TME = Low	35.23 [2.17 - inf]					PCNA+ among PCs (continuous)	1.578 [1.112 - 2.24]	0.0106	**		Response=VGPR (vs PD)	0.042 [0.001 - 3.055]	0.148
	(50:50 split of samples)											Response=PR (vs PD)	0.014 [0 - 1.404]	0.0694	*
							Gene signatures					Clus27=High	18.135 [1.37 - 240]	0.0279	**
								exp(coef)	P	Note		MKI67+ among PCs=High	0.174 [0.015 - 2.037]	0.164
							CD8A+MKI67+ = High	4.548 [0.935 - 22.126]	0.0606	*
												Clus27=High	5.938 [0.924 - 38.172]	0.0606	*
							CD8A(prot)+MKI67+ = High	4.548 [0.935 - 22.126]	0.0606	*		PCNA+ among PCs (continuous)	1.619 [1.136 - 2.308]	0.00767	***
	Tables in bold indicate main results						For variables with alternative encodings (eg. continuous vs categorical for Clus27, Age, Hb, B2M, MKI67+ among PCs, PCNA+ among PCs; or merged categories for Response), we show the result for the encoding with the best model log-likelihood P value.
	Ranges in square brackets indicate 95% confidence intervals.

## Sheet: 3b.Survival_validation
Supplementary Table 3b. Survival analyses for validation cohort.
	Kaplan-Meier estimate						Cox proportional hazards model
							Cox proportional hazards model: Single variable. CD8A+MKI67+ cut-off=0.3 (from discovery cohort)					Cox proportional hazards model: 2 variables (CD8A+MKI67+ & other variable). CD8A+MKI67+ cut-off=0.3 (from discovery cohort)					Cox proportional hazards model: Multivariable (variables with P<.1 in single-var or 2-var analysis).					Combining Discovery and Validation Cohorts, only among samples with PC proliferative indices (n=25, ie. excluding Maura samples)
		Median PFS	P (logrank test)					exp(coef)	P	Note			exp(coef)	P	Note		Exclude PC proliferative indices because only 15 samples available for that					Potential prognostic variables (GeneSig, R-ISS, PC proliferative index), individually
	CD8A+MKI67+ = High	36.8 [6 - 48]	0.00447				CD8A+MKI67+ = High	5.939 [1.508 - 23.389]	0.0109	**		CD8A+MKI67+ = High	4.565 [1.157 - 18.007]	0.0301	**			exp(coef)	P	Note			exp(coef)	P	Note
	CD8A+MKI67+ = Low	58 [48 - 58]										Age (continuous)	0.93 [0.874 - 0.989]	0.0211	**		CD8A+MKI67+ = High	6.926 [1.105 - 43.431]	0.0388	**		CD8A+MKI67+ = High	5.475 [1.971 - 15.207]	0.00111	***
	(Cut-off=0.3 from Discovery cohort, 65:35 split of samples)						Age (continuous)	0.931 [0.884 - 0.98]	0.00663	***							Age (continuous)	0.943 [0.875 - 1.017]	0.128
												CD8A+MKI67+ = High	5.448 [1.379 - 21.528]	0.0156	**		Race=Black (vs Other)	0.284 [0.001 - 112.086]	0.68			R-ISS=II (vs I)	1.317 [0.358 - 4.842]	0.679
	CD8A+MKI67+ > 0.179	48 [16.57 - inf]	0.0405				Sex=Male	2.213 [0.584 - 8.39]	0.243			Sex=Male	1.798 [0.462 - 6.997]	0.397			Race=Chinese (vs Other)	0.713 [0.093 - 5.478]	0.745			R-ISS=III (vs I)	2.99 [0.819 - 10.907]	0.0973	*
	CD8A+MKI67+ <= 0.179	58 [58 - 58]															Race=Indian (vs Other)	4.16 [0.205 - 84.459]	0.353
	(50:50 split of samples)						Race=Black (vs Other)	0.032 [0 - 368.792]	0.47			CD8A+MKI67+ = High	47.387 [3.401 - 660.171]	0.00409	***		Race=Malay (vs Other)	0.456 [0.029 - 7.229]	0.577			PCNA+ among PCs (continuous)	1.153 [1.064 - 1.249]	0.00049	***
							Race=Chinese (vs Other)	0.957 [0.188 - 4.87]	0.958			Race=Black (vs Other)	0.033 [0 - 407.745]	0.478			Race=White (vs Other)	0.283 [0.033 - 2.43]	0.25
	CD8A+MKI67+ > 0.222	48 [11 - inf]	0.0397				Race=Indian (vs Other)	5.995 [0.463 - 77.656]	0.171			Race=Chinese (vs Other)	0.061 [0.003 - 1.074]	0.056	*		R-ISS=II (vs I)	1.69 [0.254 - 11.25]	0.587
	CD8A+MKI67+ <= 0.222	58 [48 - 58]					Race=Malay (vs Other)	0.449 [0.044 - 4.602]	0.5			Race=Indian (vs Other)	9.954 [0.651 - 152.179]	0.0986			R-ISS=III (vs I)	1.433 [0.155 - 13.274]	0.751
	(60:40 split of samples)						Race=White (vs Other)	0.17 [0.019 - 1.541]	0.115			Race=Malay (vs Other)	0.375 [0.03 - 4.672]	0.446			Treatment=Daratumumab (vs Proteosome)	1.041 [0.107 - 10.156]	0.972
												Race=White (vs Other)	0.014 [0.001 - 0.304]	0.00662	***		Maintenance=Yes	0.206 [0.033 - 1.281]	0.09	*
	CD8A+MKI67+ > 0.332	48 [0 - 48]	0.0607				R-ISS=II (vs I)	0.772 [0.163 - 3.657]	0.745								Response=CR/VGPR (vs PR/PD)	0.643 [0.1 - 4.125]	0.642			Potential prognostic variables (GeneSig, R-ISS, PC proliferative index) + relevant features. Exclude race because leads to collinearity (sample size is small)
	CD8A+MKI67+ <= 0.332	58 [48 - 58]					R-ISS=III (vs I)	4.018 [0.921 - 17.536]	0.0643	*		CD8A+MKI67+ = High	8.024 [1.838 - 35.024]	0.00561	***								exp(coef)	P	Note
	(70:30 split of samples)											R-ISS=II (vs I)	0.894 [0.186 - 4.296]	0.889								CD8A+MKI67+ = High	6.42 [1.583 - 26.043]	0.00925	***
							t(11;14)=Yes	0.357 [0.051 - 2.505]	0.3			R-ISS=III (vs I)	6.514 [1.304 - 32.537]	0.0224	**							Age (continuous)	0.981 [0.927 - 1.037]	0.496
	CD8A+MKI67+ > 0.529	48 [0 - 48]	0.053																			R-ISS=II (vs I)	0.916 [0.071 - 11.763]	0.946
	CD8A+MKI67+ <= 0.529	58 [48 - 58]					t(4;14)=Yes	2.173 [0.563 - 8.381]	0.26			CD8A+MKI67+ = High	6.406 [1.675 - 24.499]	0.00665	***							R-ISS=III (vs I)	1.292 [0.2 - 8.363]	0.788
	(80:20 split of samples)											t(11;14)=Yes	0.278 [0.04 - 1.944]	0.197								Treatment=Daratumumab (vs Proteosome)	0.323 [0.017 - 6.042]	0.45
							1q.amplification=Yes	1.168 [0.307 - 4.441]	0.82													Maintenance=Yes	0.26 [0.048 - 1.402]	0.117
												CD8A+MKI67+ = High	6.339 [1.567 - 25.646]	0.00961	***							Response=CR/VGPR (vs PR/PD)	1.855 [0.418 - 8.232]	0.416
							17p.deletion=Yes	1.416 [0.176 - 11.395]	0.743			t(4;14)=Yes	2.474 [0.605 - 10.12]	0.208								PCNA+ among PCs (continuous)	1.232 [1.055 - 1.44]	0.00849	***
	PC proliferative index
		Median PFS	P (logrank test)				Monosomy 13=Yes	0.146 [0 - 150.313]	0.586			CD8A+MKI67+ = High	5.936 [1.503 - 23.438]	0.011	**
	MKI67+ among PCs=High	6 [0 - 48]	0.029				(n=26)					1q.amplification=Yes	1.074 [0.28 - 4.12]	0.918
	MKI67+ among PCs=Low	58 [16.57 - 58]
	(50:50 split of samples, excluding Maura, n=15)						Monosomy 17=Yes	5.546 [0.646 - 47.607]	0.118			CD8A+MKI67+ = High	7.39 [1.611 - 33.903]	0.0101	**							Potential prognostic variables (GeneSig, R-ISS, PC proliferative index)
												17p.deletion=Yes	3.541 [0.331 - 37.92]	0.296									exp(coef)	P	Note
	PCNA+ among PCs=High	6 [0 - inf]	0.0325																			CD8A+MKI67+ = High	5.821 [1.65 - 20.528]	0.00616	***
	PCNA+ among PCs=Low	48 [11 - 58]					Hyperdiploid=Yes	0.055 [0.001 - 2.963]	0.154			CD8A+MKI67+ = High	31.534 [0.562 - 1770.623]	0.0931	*							R-ISS=II (vs I)	0.83 [0.173 - 3.992]	0.816
	(50:50 split of samples, excluding Maura, n=15)											Monosomy 13=Yes	0.525 [0 - 5892.376]	0.892								R-ISS=III (vs I)	1.565 [0.357 - 6.866]	0.553
							Treatment=Daratumumab (vs Proteasome)	0.112 [0.029 - 0.431]	0.00144	***		(n=26)										PCNA+ among PCs (continuous)	1.217 [1.089 - 1.359]	0.00052	***
							Transplant=Yes	0.885 [0.247 - 3.176]	0.852			CD8A+MKI67+ = High	5.531 [1.362 - 22.464]	0.0168	**
	Negative control experiments: Other proliferative cells											Monosomy 17=Yes	2.553 [0.29 - 22.453]	0.398
		Median PFS	P (logrank test)				Maintenance=Yes	0.192 [0.055 - 0.672]	0.00985	***
	CD8A-MKI67+ among TME = High	48 [11 - inf]	0.293
	CD8A-MKI67+ among TME = Low	58 [36.8-58]					Response=CR (vs PD)	0.007 [0 - 0.446]	0.0189	**		CD8A+MKI67+ = High	4.663 [1.165 - 18.661]	0.0296	**		For variables with alternative encodings (eg. continuous vs categorical for GeneSig, Age, MKI67+ among PCs, PCNA+ among PCs; or merged categories for Response or R-ISS), we show the result for the encoding with the best model log-likelihood P value.
	(50:50 split of samples)						Response=PR (vs PD)	0.128 [0.006 - 2.867]	0.195			Hyperdiploid=Yes	0.078 [0.001 - 5.105]	0.232
							Response=VGPR (vs PD)	0.061 [0.003 - 1.345]	0.076	*
	CD8A- PCNA+ among TME = High	inf [31.8 - inf]	0.604									CD8A+MKI67+ = High	4.15 [1.08 - 15.947]	0.0383	**
	CD8A- PCNA+ among TME = Low	58 [48 - 58]										Treatment=Daratumumab (vs Proteasome)	0.137 [0.034 - 0.544]	0.00473	***
	(50:50 split of samples)
												CD8A+MKI67+ = High	5.219 [1.326 - 20.55]	0.0181	**
	Cut-offs swept in ranges from 20:80 split to 80:20 split of samples, all were insignificant. Only 50:50 split shown.											Transplant=Yes	0.869 [0.234 - 3.222]	0.833
							PC proliferative indices
								exp(coef)	P	Note		CD8A+MKI67+ = High	10.662 [2.315 - 49.1]	0.00239	***
							MKI67+ among PCs (continuous)	1.201 [1.044 - 1.381]	0.0105	**		Maintenance=Yes	0.109 [0.026 - 0.462]	0.00263	***
							(n=15)
												CD8A+MKI67+ = High	4.689 [1.201 - 18.309]	0.0262	**
							PCNA+ among PCs (continuous)	1.119 [1.004 - 1.247]	0.0427	**		Response=CR/VGPR (vs PR/PD)	0.358 [0.098 - 1.301]	0.119
							(n=15)
												PC proliferative indices
													exp(coef)	P	Note
												CD8A+MKI67+ = High	6.905 [1.249 - 38.164]	0.0267	**
												MKI67+ among PCs=High	6.897 [1.188 - 40.044]	0.0314	**
	Ranges in square brackets indicate 95% confidence intervals.											(n=15)
	Tables in bold indicate main results
												CD8A+MKI67+ = High	5.044 [1.112 - 22.89]	0.036	**
												PCNA+ among PCs (continuous)	1.141 [1.007 - 1.292]	0.0379
												(n=15)
							For variables with alternative encodings (eg. continuous vs categorical for CD8A+MKI67+, Age, MKI67+ among PCs, PCNA+ among PCs; or merged categories for Response), we show the result for the encoding with the best model log-likelihood P value.

## Sheet: 3c.Survival_TMA
Supplementary Table 3c. Survival analyses for TMA cohort.
	Kaplan-Meier estimate						Cox proportional hazards model
	GeneSig						Cox proportional hazards model: Single variable					Cox proportional hazards model: 2 variables (CD8+Ki67+ [cutoff=2] & other variable)					Cox proportional hazards model: Multivariable (variables with P<.1 in single-var or 2-var analysis).					Potential prognostic variables (CD8+Ki67+, R-ISS and Ki67+ among PCs) + relevant features. CD8+Ki67+ cutoff=4 (best model log-likelihood)
		Median PFS	P (logrank test)					exp(coef)	P	Note			exp(coef)	P	Note		CD8+Ki67+ cutoff=4 (best model log-likelihood)						exp(coef)	P	Note
	CD8+Ki67+ = High	33 [28 - 43]	0.0475				CD8+Ki67+ = High	1.848 [1.042 - 3.277]	0.0357	**		CD8+Ki67+ = High	1.963 [1.09 - 3.537]	0.0247	**			exp(coef)	P	Note		CD8+Ki67+ = High	2.063 [1.139 - 3.735]	0.0168	**
	CD8+Ki67+ = Low	95 [24 - 121]					(Cut-off=2, which gives best model log-likehood)					Age (continuous)	0.987 [0.958 - 1.016]	0.363			CD8+Ki67+ = High	1.744 [1.036 - 2.935]	0.0364	**		B2M=High	1.573 [0.839 - 2.949]	0.157
	(Cut-off=1.5, 23:77 split of samples)																B2M=High	1.495 [0.896 - 2.493]	0.123			13q deletion=Yes	1.42 [0.722 - 2.792]	0.31
							Age (continuous)	0.995 [0.997 - 1.024]	0.722			CD8+Ki67+ = High	1.734 [0.974 - 3.088]	0.0617	*		13q deletion=Yes	1.708 [0.92 - 3.174]	0.0902	*		Transplant=Yes	0.412 [0.228 - 0.745]	0.00335	***
	CD8+Ki67+ = High	33 [28 - 46]	0.0321									B2M=High	1.579 [0.976 - 2.557]	0.063	*		Transplant=Yes	0.507 [0.303 - 0.85]	0.00994	***		R-ISS=II (vs I)	0.862 [0.409 - 1.816]	0.696
	CD8+Ki67+ = Low	53 [24 - 121]					B2M=High	1.679 [1.04 - 2.709]	0.0339	**												R-ISS=III (vs I)	1.334 [0.41 - 4.333]	0.632
	(Cut-off=2, 29:71 split of samples)											CD8+Ki67+ = High	1.985 [1.101 - 3.576]	0.0226	**							Ki67+ among PCs (continuous)	0.962 [0.907 - 1.02]	0.191
							R-ISS=II (vs I)	1.081 [0.604 - 1.934]	0.794			R-ISS=II (vs I)	1.037 [0.579 - 1.855]	0.903
	CD8+Ki67+ = High	32 [22 - 51]	0.0343				R-ISS=III (vs I)	1.479 [0.627 - 3.484]	0.371			R-ISS=III (vs I)	1.762 [0.736 - 4.222]	0.204
	CD8+Ki67+ = Low	43 [31 - 108]															CD8+Ki67+ cutoff=2
	(Cut-off=3, 40:60 split of samples)						t(11;14)=Yes	1.385 [0.759 - 2.528]	0.289			CD8+Ki67+ = High	1.799 [0.929 - 3.487]	0.0818	*			exp(coef)	P	Note
												t(11;14)=Yes	1.309 [0.715 - 2.395]	0.382			CD8+Ki67+ = High	1.887 [0.987 - 3.608]	0.0549	*
	CD8+Ki67+ = High	32 [25 - 46]	0.086				t(4;14)=Yes	0.968 [0.417 - 2.247]	0.939								B2M=High	1.414 [0.848 - 2.359]	0.184			Potential prognostic variables (CD8+Ki67+, R-ISS and Ki67+ among PCs). CD8+Ki67+ cutoff=3 (best model log-likelihood)
	CD8+Ki67+ = Low	43 [31 - 67]										CD8+Ki67+ = High	1.907 [0.975 - 3.732]	0.0594	*		13q deletion=Yes	1.699 [0.917 - 3.146]	0.092	*			exp(coef)	P	Note
	(Cut-off=4, 50:50 split of samples)						17p deletion=Yes	1.26 [0.541 - 2.931]	0.592			t(4;14)=Yes	0.802 [0.339 - 1.894]	0.614			Transplant=Yes	0.58 [0.343 - 0.981]	0.0421	**		CD8+Ki67+ = High	1.932 [1.109 - 3.366]	0.0201	**
																						R-ISS=II (vs I)	0.982 [0.555 - 1.735]	0.949
							13q deletion=Yes	1.705 [0.972 - 2.99]	0.0625	*		CD8+Ki67+ = High	1.823 [0.939 - 3.54]	0.076	*							R-ISS=III (vs I)	1.83 [0.766 - 4.373]	0.174
												17p.deletion=Yes	1.12 [0.479 - 2.623]	0.793								Ki67+ among PCs (continuous)	0.989 [0.94 - 1.04]	0.657
	PC proliferative index						Palliative=Yes	0.152 [0 - 562.828]	0.653
		Median PFS	P (logrank test)									CD8+Ki67+ = High	2.217 [1.149 - 4.278]	0.0177	**
	Ki67+ among PCs = High	41 [28 - 51]	0.165									13q deletion=Yes	2.019 [1.134 - 3.595]	0.017	**
	Ki67+ among PCs = Low	41 [16 - 118]					Proteasome Inhibitor=Yes	1.202 [0.44 - 3.283]	0.72
	(Cut-off=3.23, 20:80 split of samples)											CD8+Ki67+ = High	1.844 [1.039 - 3.27]	0.0365	**
												Palliative=Yes	0.162 [0 - 660.952]	0.668
	Ki67+ among PCs = High	41 [28 - 52]	0.462				Transplant=Yes	0.508 [0.308 - 0.836]	0.00775	***
	Ki67+ among PCs = Low	38 [24 - 56]										CD8+Ki67+ = High	1.949 [1.043 - 3.643]	0.0365	**
	(Cut-off=3.9, 30:70 split of samples)						Maintenance=Yes	0.816 [0.494 - 1.348]	0.427			Proteasome Inhibitor=Yes	0.771 [0.256 - 2.326]	0.645
	Ki67+ among PCs = High	33 [26 - 51]	0.167				MKI67+ among PCs=High	1.359 [0.83 - 2.226]	0.223			CD8+Ki67+ = High	1.677 [0.936 - 3]	0.0823	*
	Ki67+ among PCs = Low	41 [30 - 56]					(Cut-off=5, which gives best model log-likelihood)					Transplant=Yes	0.551 [0.332 - 0.912]	0.0206	**
	(Cut-off=5.2, 40:60 split of samples)
												CD8+Ki67+ = High	1.833 [1.034 - 3.248]	0.038	**
												Maintenance=Yes	0.831 [0.502 - 1.375]	0.471
	Negative control experiments: Other proliferative cells											CD8+Ki67+ = High	1.916 [1.054 - 3.484]	0.033	**
		Median PFS	P (logrank test)				Other CD8+KI67+ cut-offs					MKI67+ among PCs (continuous)	0.989 [0.941 - 1.041]	0.677
	CD8-Ki67+ among TME = High	41 [26 - 53]	0.474					exp(coef)	P	Note
	CD8-Ki67+ among TME = Low	37 [28 - 54]					CD8+KI67+ = High	1.704 [1.03 - 2.821]	0.0382	**
	(Cut-off=13.31, 50:50 split of samples)						(Cut-off=3)
	Ki67+ among all cells = High	33 [26 - 51]	0.178				CD8+KI67+ = High	1.523 [0.938 - 2.472]	0.0886	*
	Ki67+ among all cells = Low	41 [24 - 61]					(Cut-off=4)
	(Cut-off=11.79, 40:60 split of samples)
							For variables with alternative encodings (eg. continuous vs categorical for CD8+Ki67+, Age, B2M, MKI67+ among PCs, or different cutoffs for CD8+Ki67+ and MKI67+ among PCs), we show the result for the encoding with the best model log-likelihood P value.
	Cut-offs swept in ranges from 20:80 split to 80:20 split of samples. Best ones shown.
	Ranges in square brackets indicate 95% confidence intervals.
	Tables in bold indicate main results

## Sheet: 4.Patients_TMA
Supplementary Table 4. Patient characteristics for TMA dataset.
Study ID	Age	B2M	R-ISS	t(4;14)	t(11;14)	17p13 deletion	13q deletion	Palliative	Proteasome Inhibitor	Maintenance	Transplant	total nuclei	num CD138	num CD138-	num CD8	num CD3 CD8	num Ki67	num CD8 Ki67	num CD3 CD8 Ki67	num CD8 CD138-	num CD3 CD8 CD138-	num CD8 Ki67 CD138-	num CD3 CD8 Ki67 CD138-	num CD8- Ki67 CD138-	num CD8- CD138-	num Ki67 CD138-	num Ki67 CD138	% CD138- / all	% CD138 / all	% Ki67 / all	% CD8 / CD138-	% CD3 CD8 / CD138-	% CD8 Ki67 / CD138-	% CD3 CD8 Ki67 / CD138-	% CD8- Ki67 / CD138-	% Ki67 / CD138	PFS	Event (relapse)
TMA001	62	8.631	3	1	0	1	1	0	1	0	1	6092	2259	3833	702	384	1274	266	104	433	188	191	62	792	3400	983	291	62.9186	37.0814	20.9127	11.2966	4.90477	4.98304	1.61753	20.6627	12.8818	5	1
TMA002	63	6.788	2	0	0	0	0	0	1	0	1	2783	1534	1249	473	248	333	77	26	276	144	54	21	125	973	179	154	44.8796	55.1204	11.9655	22.0977	11.5292	4.32346	1.68135	10.008	10.0391	16	1
TMA003	78	2.538	2	0	0	1	0	0	1	0	0	4923	469	4454	603	141	752	91	7	541	136	73	6	572	3913	645	107	90.4733	9.52671	15.2752	12.1464	3.05344	1.63898	0.13471	12.8424	22.8145	14	0
TMA004	52	3.985	2					0	1	0	1	4885	3663	1222	216	13	128	15	1	75	6	6	0	59	1147	65	63	25.0154	74.9846	2.62027	6.13748	0.490998	0.490998	0	4.82815	1.7199	43	1
TMA005	86	4.059	2	0	0	0	0	0	0	0		2471	529	1942	418	369	404	151	144	352	320	139	134	231	1590	370	34	78.5917	21.4083	16.3497	18.1256	16.4779	7.15757	6.9001	11.895	6.42722	2	0
TMA006	59	4.544	2	0	0	0	0	0	0	0	1	4602	1618	2984	157	88	81	1	1	130	65	1	1	58	2854	59	22	64.8414	35.1586	1.7601	4.35657	2.17828	0.0335121	0.0335121	1.9437	1.3597	37	1
TMA007	53	1.302	1					0	1	0	1	3543	1512	2031	334	39	301	36	6	232	27	29	5	203	1799	232	69	57.3243	42.6757	8.49563	11.4229	1.32939	1.42787	0.246184	9.99508	4.56349	125	1
TMA008	67	11.3	2	0	0	0	1	0	1	0	0	2971	933	2038	281	46	97	25	1	183	32	20	0	46	1855	66	31	68.5964	31.4036	3.26489	8.97939	1.57017	0.981354	0	2.25711	3.32262	13	1
TMA009	55	2.271	1	0	0	0	0	0	1	0	1	3083	383	2700	226	57	703	81	5	178	48	75	5	595	2522	670	33	87.577	12.423	22.8025	6.59259	1.77778	2.77778	0.185185	22.037	8.61619	106	0
TMA010	62	4.414	2	0	0	0	0	0	1	0	0	5337	2320	3017	152	113	460	10	8	102	73	3	2	262	2915	265	195	56.5299	43.4701	8.61907	3.38084	2.41962	0.0994365	0.066291	8.68412	8.40517	4	1
TMA011	69	5.647	2	0	0	0	0	0	1	0	0	6622	1813	4809	1257	9	1470	255	1	798	6	168	1	1024	4011	1192	278	72.6216	27.3784	22.1987	16.5939	0.124766	3.49345	0.0207943	21.2934	15.3337	64	1
TMA012	85	6.482	3					1	0	0	0	3149	180	2969	566	4	301	63	0	509	3	61	0	234	2460	295	6	94.2839	5.7161	9.55859	17.1438	0.101044	2.05456	0	7.88144	3.33333	9	0
TMA013	60	3.596	2	0	0	0	0	0	1	1	1	3524	1236	2288	920	98	640	178	13	507	70	145	11	394	1781	539	101	64.9262	35.0738	18.1612	22.1591	3.05944	6.33741	0.480769	17.2203	8.17152	85	0
TMA014	56	23.793	3	0	0	0	1	0	1	0	1	4635	2749	1886	293	20	409	22	0	123	8	13	0	294	1763	307	102	40.6904	59.3096	8.82416	6.52174	0.424178	0.68929	0	15.5885	3.71044	53	1
TMA015	71	3.843	2	0	0	0	0	0	1	0	0	4714	1974	2740	293	144	527	32	7	229	105	30	7	455	2511	485	42	58.1247	41.8753	11.1795	8.35766	3.83212	1.09489	0.255474	16.6058	2.12766	38	1
TMA016	61	16.111	2	0	0	0	0	0	1	1	0	3033	265	2768	312	304	864	131	128	259	251	129	126	715	2509	844	20	91.2628	8.73722	28.4866	9.35694	9.06792	4.6604	4.55202	25.8309	7.54717	16	1
TMA017	63	2.655	1					0	0	1	1	12254	2994	9260	572	437	1623	117	80	381	273	57	31	976	8879	1033	590	75.5672	24.4328	13.2447	4.11447	2.94816	0.615551	0.334773	10.54	19.7061	95	1
TMA018	74	4.136	2	0	0	0	0	1	0	0	0	5604	3670	1934	552	44	342	35	3	199	16	19	3	119	1735	138	204	34.5111	65.4889	6.10278	10.2896	0.827301	0.98242	0.155119	6.15305	5.55858	7	0
TMA019	81	5.024	2	0	1	0	1	0	1	0	0	6508	3622	2886	1132	47	653	169	6	453	32	120	5	340	2433	460	193	44.3454	55.6546	10.0338	15.6965	1.1088	4.158	0.17325	11.781	5.32855	10	1
TMA020	62	3.294	1	0	0	0	0	0	1	1	1	4320	2167	2153	54	50	56	1	1	35	33	1	1	38	2118	39	17	49.838	50.162	1.2963	1.62564	1.53275	0.0464468	0.0464468	1.76498	0.784495	152	0
TMA021	62	2.231	2	0	0	1	1	0	1	0	1	5214	2281	2933	362	294	570	87	60	266	209	71	47	391	2667	462	108	56.2524	43.7476	10.9321	9.06921	7.12581	2.42073	1.60245	13.3311	4.73477	41	1
TMA022	53	33.414	3				1	0	1	0	1	8839	1825	7014	119	87	117	10	8	96	67	10	8	98	6918	108	9	79.3529	20.6471	1.32368	1.36869	0.955232	0.142572	0.114058	1.39721	0.493151	24	1
TMA023	70	2.68	1	0	0	0	0	0	1	0	0	7441	1234	6207	663	404	1452	176	83	490	283	161	73	1161	5717	1322	130	83.4162	16.5838	19.5135	7.89431	4.55937	2.59385	1.17609	18.7047	10.5348	20	1
TMA024	74	3.593	2	0	0	0	0	0	1	0	0	4972	2974	1998	639	90	234	40	5	253	47	31	5	153	1745	184	50	40.185	59.815	4.70636	12.6627	2.35235	1.55155	0.25025	7.65766	1.68124	15	1
TMA025	61	4.055	2	0	0	0	0	0	1	1	1	6797	4337	2460	695	38	220	18	0	308	22	14	0	128	2152	142	78	36.1924	63.8076	3.23672	12.5203	0.894309	0.569106	0	5.20325	1.79848	77	0
TMA026	67	6.291	2	0	0	0	0	0	0	0	0	3572	1134	2438	267	199	385	34	15	158	103	33	14	324	2280	357	28	68.2531	31.7469	10.7783	6.48072	4.22477	1.35357	0.574241	13.2896	2.46914	7	0
TMA027	67	1.809	2	0	0	1	0	0	1	0	1	1574	290	1284	395	369	351	157	145	321	298	145	133	181	963	326	25	81.5756	18.4244	22.2999	25	23.2087	11.2928	10.3583	14.0966	8.62069	56	1
TMA028	66	3.417	2	0	1	0	0	0	1	0	1	5223	2866	2357	788	680	638	192	148	300	238	109	79	352	2057	461	177	45.1273	54.8727	12.2152	12.728	10.0976	4.62452	3.35172	14.9342	6.17585	14	1
TMA029	55	33.414	3				1	0	1	0	1	7567	1594	5973	490	347	801	39	15	432	302	35	11	670	5541	705	96	78.9348	21.0652	10.5854	7.23255	5.05609	0.58597	0.184162	11.2171	6.02258	144	1
TMA030	77	8.755	2	0	1	0	0	0	1	0	0	1969	1038	931	97	55	11	6	5	72	38	4	4	4	859	8	3	47.2829	52.7171	0.558659	7.73362	4.08163	0.429646	0.429646	0.429646	0.289017	16	1
TMA031	73	19.206	3	0	0	0	1	0	1	0	0	2839	1853	986	375	102	271	41	9	169	41	22	6	107	817	129	142	34.7305	65.2695	9.54561	17.14	4.15822	2.23124	0.608519	10.8519	7.66325	4	0
TMA032	59	4.205	2	0	0	0	0	0	0	0	1	6042	759	5283	530	240	515	43	15	492	215	43	15	458	4791	501	14	87.4379	12.5621	8.52367	9.31289	4.06966	0.813931	0.28393	8.66932	1.84453	121	1
TMA033	73	3.354	1	0	1	0	0	0	1	1	0	3777	536	3241	1237	610	1038	485	202	1030	467	478	198	529	2211	1007	31	85.8088	14.1912	27.4821	31.7803	14.4091	14.7485	6.10923	16.3221	5.78358	11	1
TMA034	60	1.1919	1	0	0	0	0	0	1	0	1	5925	1904	4021	837	302	1508	218	88	515	210	191	79	1072	3506	1263	245	67.865	32.135	25.4515	12.8078	5.22258	4.75006	1.96469	26.66	12.8676	22	1
TMA035	79	4.428	2	1	0	0	1	0	1	0	0	3572	1921	1651	774	682	268	130	113	367	292	100	84	106	1284	206	62	46.2206	53.7794	7.5028	22.229	17.6863	6.05694	5.08783	6.42035	3.22749	11	1
TMA036	76	7.588	2	0	0	0	1	0	1	0	0	6411	2778	3633	1881	670	1378	455	79	1072	370	283	35	638	2561	921	457	56.6682	43.3318	21.4943	29.5073	10.1844	7.78971	0.963391	17.5612	16.4507	6	1
TMA037	59	8.024	2	0	0	0	0	0	1	1	1	11088	3707	7381	963	216	2064	181	32	612	150	139	23	1567	6769	1706	358	66.5675	33.4325	18.6147	8.29156	2.03224	1.88321	0.311611	21.2302	9.6574	43	1
TMA038	75	5.514	2	0	0	0	0	0	1	1	0	3835	1266	2569	1356	564	1048	349	163	676	284	262	121	598	1893	860	188	66.9883	33.0117	27.3272	26.3137	11.0549	10.1985	4.71	23.2775	14.8499	71	1
TMA039	65	1.528	1	0	1	0	0	0	1	1	1	3577	257	3320	1053	629	498	342	201	914	539	336	197	153	2406	489	9	92.8152	7.18479	13.9223	27.5301	16.2349	10.1205	5.93373	4.60843	3.50195	33	1
TMA040	62	3.841	2	0	0	0	0	0	1	0	1	3504	219	3285	360	167	623	100	17	342	155	99	17	516	2943	615	8	93.75	6.25	17.7797	10.411	4.71842	3.0137	0.517504	15.7078	3.65297	56	1
TMA041	72	1.616	1	0	1	0	0	0	1	0	0	3618	681	2937	666	361	950	276	107	472	227	256	99	635	2465	891	59	81.1774	18.8226	26.2576	16.0708	7.72898	8.71638	3.37079	21.6207	8.66373	29	1
TMA042	59	3.839	2	0	0	0	0	0	1	0	1	6071	2494	3577	269	25	578	127	4	138	8	77	3	326	3439	403	175	58.9195	41.0805	9.52067	3.85798	0.223651	2.15264	0.0838692	9.11378	7.01684	31	1
TMA043	55	4.357	2					0	0	0	1	14798	6896	7902	1280	471	620	43	9	655	159	20	1	268	7247	288	332	53.3991	46.6009	4.18976	8.28904	2.01215	0.2531	0.012655	3.39155	4.81439	6	1
TMA044	55	15.484	2	0	0	0	1	0	1	0	1	5784	2057	3727	500	228	251	43	13	342	129	36	10	155	3385	191	60	64.4364	35.5636	4.33956	9.17628	3.46123	0.965924	0.268312	4.15884	2.91687	118	1
TMA045	66	14.724	2	0	1	0	0	0	1	0	0	3152	1239	1913	1389	694	60	47	14	681	282	40	13	12	1232	52	8	60.6916	39.3084	1.90355	35.5985	14.7412	2.09096	0.679561	0.627287	0.645682	13	1
TMA046	51	3.69	2					0	1	0	0	3290	518	2772	1330	1103	422	322	248	1009	839	312	241	95	1763	407	15	84.2553	15.7447	12.8267	36.3997	30.267	11.2554	8.69408	3.42713	2.89575	30	1
TMA047	56	6.338	3	0	0	0	0	0	1	0	0	9078	3963	5115	1101	160	1971	270	78	461	100	161	52	1166	4654	1327	644	56.345	43.655	21.7118	9.01271	1.95503	3.14761	1.01662	22.7957	16.2503	3	1
TMA048	63	46.289	3	0	0	0	0	0	1	0		7626	1476	6150	813	234	1377	131	64	703	190	111	53	1054	5447	1165	212	80.6452	19.3548	18.0566	11.4309	3.08943	1.80488	0.861789	17.1382	14.3631	0	0
TMA049	43	8.445	3	1	0	0	1	0	1	1	1	6673	4061	2612	940	222	1223	179	52	384	95	91	22	512	2228	603	620	39.1428	60.8572	18.3276	14.7014	3.63706	3.48392	0.842266	19.6018	15.2672	8	1
TMA050	58	7.441	2	0	0	0	0	0	1	0	1	11231	2911	8320	2258	1064	2275	488	102	1940	872	475	100	1660	6380	2135	140	74.0807	25.9193	20.2564	23.3173	10.4808	5.70913	1.20192	19.9519	4.80934	3	1
TMA051	50	11.995	2	0	0	0	0	0	1	0	1	6347	1379	4968	631	349	1486	157	55	472	243	143	47	1237	4496	1380	106	78.2732	21.7268	23.4126	9.50081	4.8913	2.87842	0.946055	24.8994	7.68673	28	1
TMA052	60	4.328	2	1	0	0	0	0	1	0	1	4286	554	3732	1023	537	1282	371	191	878	441	346	170	881	2854	1227	55	87.0742	12.9258	29.9113	23.5263	11.8167	9.27117	4.5552	23.6066	9.9278	125	0
TMA053	48	2.102	2	1	0	0	0	0	1	0	1	12466	2662	9804	2430	1051	1995	446	227	1719	732	382	185	1438	8085	1820	175	78.6459	21.3541	16.0035	17.5337	7.46634	3.89637	1.88698	14.6675	6.574	17	1
TMA054	71	2.812	1	0	1	0	0	0	1	0	0	3883	590	3293	980	752	638	212	167	733	546	189	149	411	2560	600	38	84.8056	15.1944	16.4306	22.2593	16.5806	5.73945	4.52475	12.481	6.44068	25	1
TMA055	66	8.511	2	0	0	0	0	0	1	0	1	2610	1287	1323	1415	937	162	117	45	610	313	86	28	35	713	121	41	50.6897	49.3103	6.2069	46.1073	23.6584	6.50038	2.1164	2.6455	3.1857	136	0
TMA056	53	3.087	1	0	0	0	0	0	1	1	1	3041	479	2562	948	587	894	239	195	684	443	228	189	638	1878	866	28	84.2486	15.7514	29.3982	26.6979	17.2912	8.8993	7.37705	24.9024	5.84551	26	1
TMA057	64	10.851	2	0	1	0	0	0	1	1	0	5557	1389	4168	1161	472	324	110	32	718	244	97	27	193	3450	290	34	75.0045	24.9955	5.83048	17.2265	5.85413	2.32726	0.647793	4.63052	2.4478	41	1
TMA058	42	1.786	2	0	1	0	0	0	1	1	1	10792	1134	9658	2490	708	706	192	38	2044	558	184	37	504	7614	688	18	89.4922	10.5078	6.54188	21.1638	5.77759	1.90516	0.383102	5.21847	1.5873	105	0
TMA059	56	19.251	2	0	1	0	0	0	1	0	1	7396	1403	5993	895	177	2138	165	80	624	134	144	68	1857	5369	2001	137	81.0303	18.9697	28.9075	10.4121	2.23594	2.4028	1.13466	30.9862	9.76479	43	1
TMA060	74	2.328	2	1	0	0	0	0	1	1	0	1266	187	1079	152	98	242	31	28	118	78	30	27	203	961	233	9	85.2291	14.7709	19.1153	10.9361	7.22892	2.78035	2.50232	18.8137	4.81283	71	0
TMA061	48	16.967	3	0	0	1	1	0	1	1	0	4593	2348	2245	2687	1640	322	222	127	1183	539	138	55	62	1062	200	122	48.8787	51.1213	7.01067	52.6949	24.0089	6.14699	2.44989	2.76169	5.19591	6	1
TMA062	68	3.446	1	0	0	0	1	0	1	0	0	4805	834	3971	631	276	1096	176	69	496	204	164	62	871	3475	1035	61	82.6431	17.3569	22.8096	12.4906	5.13725	4.12994	1.56132	21.934	7.31415	43	1
TMA063	41	2.484	1	0	0	0	1	0	1	0	0	7816	799	7017	2257	1176	1853	607	224	1953	960	584	205	1202	5064	1786	67	89.7774	10.2226	23.7078	27.8324	13.6811	8.32265	2.92148	17.1298	8.38548	4	1
TMA064	68	1.48	2	0	0	0	0	0	1	0	1	11114	2610	8504	1208	647	787	145	94	805	429	112	76	554	7699	666	121	76.5161	23.4839	7.08116	9.46613	5.04468	1.31703	0.893697	6.51458	4.63602	69	0
TMA065	69	2.285	1	0	0	0	0	0	1	0	0	1876	74	1802	758	579	685	307	290	709	545	297	281	368	1093	665	20	96.0554	3.94456	36.5139	39.3452	30.2442	16.4817	15.5938	20.4218	27.027	65	0
TMA066	54	2.413	2	0	0	0	0	0	1	1	1	1317	491	826	547	277	199	59	37	276	155	57	36	123	550	180	19	62.7183	37.2817	15.1101	33.414	18.7651	6.90073	4.35835	14.891	3.86965	32	1
TMA067	56	3.085	1	0	0	0	0	0	1	0	1	4228	557	3671	1178	632	964	300	99	857	396	289	93	635	2814	924	40	86.8259	13.1741	22.8004	23.3451	10.7873	7.87251	2.53337	17.2977	7.18133	51	1
TMA068	47	2.416	1	0	0	0	0	0	1	1	1	2408	1326	1082	1500	769	284	112	57	489	196	68	32	141	593	209	75	44.9336	55.0664	11.794	45.1941	18.1146	6.28466	2.95749	13.0314	5.65611	28	1
TMA069	56	2.856	1	0	1	0	0	0	1	0	1	3555	914	2641	2041	1003	700	335	260	1341	645	301	232	341	1300	642	58	74.2897	25.7103	19.6906	50.7762	24.4226	11.3972	8.78455	12.9118	6.34573	54	1
TMA070	56	4.75	2	0	1	0	0	0	1	0	0	3597	592	3005	1759	995	960	412	347	1306	765	386	322	530	1699	916	44	83.5418	16.4582	26.6889	43.4609	25.4576	12.8453	10.7155	17.6373	7.43243	2	1
TMA071	61	2.973	2	0	0	0	0	0	1	0	1	4271	826	3445	1362	538	750	193	133	973	369	174	118	526	2472	700	50	80.6603	19.3397	17.5603	28.2438	10.7112	5.0508	3.42525	15.2685	6.05327	53	1
TMA072	61	5.271	2	0	0	0	0	0	1	1	1	9281	2893	6388	3425	1255	1557	543	240	2185	739	424	175	864	4203	1288	269	68.8288	31.1712	16.7762	34.2048	11.5686	6.63745	2.73951	13.5254	9.29831	54	1
TMA073	57	3.972	2					0	1	1	1	3529	878	2651	1908	874	500	311	102	1287	534	289	90	181	1364	470	30	75.1204	24.8796	14.1683	48.5477	20.1433	10.9015	3.39495	6.82761	3.41686	43	1
TMA074	76	50	2	0	0	0	0	0	1	0	1	2551	362	2189	816	382	797	303	121	708	335	286	117	476	1481	762	35	85.8095	14.1905	31.2426	32.3435	15.3038	13.0653	5.34491	21.7451	9.66851	68	1
TMA075	63	8.525	2	0	1	0	0	0	1	0	1	10251	3338	6913	2953	826	1555	380	131	1813	518	317	104	1067	5100	1384	171	67.4373	32.5627	15.1693	26.226	7.49313	4.58556	1.50441	15.4347	5.12283	71	0
TMA076	67		2	0	0	0	1	0	1	1	0	2184	943	1241	1170	514	206	102	53	615	286	74	38	95	626	169	37	56.8223	43.1777	9.43223	49.5568	23.0459	5.96293	3.06205	7.65512	3.92365	54	1
TMA077	65	3.582	2	1	0	0	1	0	1	1	1	3046	812	2234	966	507	446	130	102	613	318	117	90	299	1621	416	30	73.3421	26.6579	14.6422	27.4396	14.2346	5.23724	4.02865	13.3841	3.69458	16	1
TMA078	63	3.851	2	0	0	0	0	0	1	1	0	3456	1497	1959	265	87	396	28	21	152	48	18	13	267	1807	285	111	56.684	43.316	11.4583	7.75906	2.45023	0.918836	0.663604	13.6294	7.41483	108	1
TMA079	67	13.989	3	1	0	0	0	0	1	0	1	2613	1413	1200	2103	1685	77	62	40	842	522	35	20	10	358	45	32	45.9242	54.0758	2.9468	70.1667	43.5	2.91667	1.66667	0.833333	2.26469	61	1
TMA080	46	22.584	2	0	0	0	0	0	1	1	1	12747	4862	7885	5699	1016	2271	1424	271	3208	499	967	167	634	4677	1601	670	61.8577	38.1423	17.816	40.6848	6.32847	12.2638	2.11795	8.04058	13.7803	31	1
TMA081	59	7.945	2	0	0	0	0	0	1	1	1	2881	639	2242	1647	1275	499	373	272	1150	870	338	245	116	1092	454	45	77.8202	22.1798	17.3204	51.2935	38.8046	15.0758	10.9277	5.17395	7.04225	33	1
TMA082	55	5.424	2	0	0	0	0	0	1	1	1	4480	483	3997	1720	1081	974	507	340	1404	848	458	302	440	2593	898	76	89.2188	10.7812	21.7411	35.1263	21.2159	11.4586	7.55567	11.0083	15.735	51	1
TMA083	81	5.249	2	0	1	1	1	0	1	1	0	3152	640	2512	730	418	557	109	95	548	293	90	78	412	1964	502	55	79.6954	20.3046	17.6713	21.8153	11.664	3.5828	3.1051	16.4013	8.59375	67	1
TMA084	66	6.518	2	0	0	0	0	0	1	1	1	2126	642	1484	791	566	434	150	134	430	296	126	111	249	1054	375	59	69.8024	30.1976	20.4139	28.9757	19.9461	8.49057	7.47978	16.779	9.19003	28	1
TMA085	57	5.139	2	0	0	1	0	0	1	1	1	6856	525	6331	1486	1111	801	356	234	1261	936	327	216	426	5070	753	48	92.3425	7.65753	11.6832	19.9179	14.7844	5.16506	3.41178	6.72879	9.14286	52	1
TMA086	40	1.562	1	0	1	0	0	0	1	0	0	3357	750	2607	1551	875	928	448	282	1107	621	394	244	438	1500	832	96	77.6586	22.3414	27.6437	42.4626	23.8205	15.1132	9.35942	16.8009	12.8	46	1
